# Supplementary material for: Photoinduced 1,2,3,4-tetrahydropyridine ring conversions
Source: publisher site journal article supplement (doi:10.3762/bjoc.11.234), 2015-11-11
Supplement: Additional file 1 [file 1860-5397-11-234-S1.pdf]

Supporting Information  
for

**Photoinduced 1,2,3,4-tetrahydropyridine ring  
conversions**

Baiba Turovska\*<sup>1</sup>, Henning Lund<sup>2</sup>, Viesturs Lūsis<sup>1</sup>, Anna Lielpētere<sup>1</sup>, Edvards Liepiņš<sup>1</sup>,  
Sergejs Beljakovs<sup>1</sup>, Inguna Goba<sup>1</sup> and Jānis Stradiņš<sup>1</sup>

Address: <sup>1</sup>Physical-organic Chemistry Laboratory, Latvian Institute of Organic Synthesis,  
21 Aizkraukles Str., Riga LV-1006, Latvia and <sup>2</sup>Department of Organic Chemistry, Aarhus  
University, Langelandsgade 140, DK 8000 Aarhus, Denmark

Email: Baiba Turovska\* - [turovska@osi.lv](mailto:turovska@osi.lv)

\* Corresponding author

**Experimental and analytical data**

## Methods and instruments

The reaction products were analysed by  $^1\text{H}$  and  $^{13}\text{C}$  NMR spectra registered on a Bruker DMX 500 spectrometer. The progress of the photochemical reaction of **1** was monitored by  $^1\text{H}$  NMR spectra on a Bruker WH 90 spectrometer.

Cyclic voltammetry was recorded using Advanced Electrochemical System PARSTAT 2273.

UV spectra were recorded on Camspec M501 Single Beam Scanning UV/Visible Spectrophotometer.

Infrared spectra were recorded on a Perkin-Elmer 580B spectrometer.

GC-MS spectra were obtained by Hewlett-Packard Model GC 6890 gas chromatograph coupled with mass selective detector.

Elemental analyses were performed at EA 1106 (Carlo Erba Instruments).

Melting points were obtained on a BÜCHI 535.

X-ray crystallographic analysis were done on Nonius Kappa CCD.

## Experimental section

3,5-Diethoxycarbonyl-2,6-dimethyl-4-phenyl-1,2,3,4-tetrahydropyridine (**1**) was synthesized from the corresponding 1,4-dihydropyridine according to a general procedure<sup>1</sup>.

$^1\text{H}$  NMR (500 MHz,  $\text{CDCl}_3$ ,  $\delta$ ): 0.71 (t,  $J=7.0$  Hz, 3-COOCH<sub>2</sub>CH<sub>3</sub>, 3H), 1.03 (t,  $J=7.0$  Hz, 5-COOCH<sub>2</sub>CH<sub>3</sub>, 3H), 1.11 (d,  $J=7.0$  Hz, 2-CH<sub>3</sub>, 3H), 2.30 (d,  $J=1.0$  Hz, 6-CH<sub>3</sub>, 3H), 2.42 (t,  $J=10.0$  Hz, 3-H, 1H), 3.52 (m,  $J=10.0$  & 7.0 & 1.0 Hz, 2-H, 1H), 3.71 (dq,  $J=7.0$  & 1.2 Hz, 3-COOCH<sub>2</sub>CH<sub>3</sub>, 2H), 3.94 (broad s, NH, 1H), 3.98 (q,  $J=7.0$  Hz, 5-COOCH<sub>2</sub>CH<sub>3</sub>, 2H), 4.06 (broad d,  $J=10.0$  Hz, 4-H, 1H), 7.08 (m, ArH, 5H) ppm.

Mp 144-146 °C.

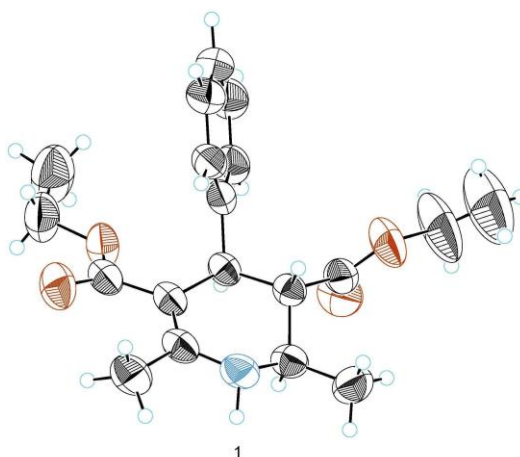

X-ray structure (CCDC 667862)

<sup>1</sup> Rosentreter, U. *Synthesis* **1985**, 2, 210.

## I Oxidation of 1 in solutions saturated by dioxygen

### 3,5-Diethoxycarbonyl-2,6-dimethyl-3-hydroperoxy-4-phenyl-3,4,5,6-tetrahydropyridine (2)

0.12080 g (0.36 mmol) of 3,5-diethoxycarbonyl-2,6-dimethyl-4-phenyl-1,2,3,4-tetrahydropyridine (1) was dissolved in 20 mL  $\text{CHCl}_3$ . Oxygen was intensively blew through the solution, therefore the volumetric flask of bigger volume (50 mL) was preferred. The solution was exposed to direct sunlight. After 35 min  $\text{CHCl}_3$  was evaporated due to the continuous flow of dioxygen and crystals of hydroperoxy 2 suitable for X-ray diffraction analysis were obtained.

$^1\text{H}$  NMR (500 MHz,  $\text{CDCl}_3$ ,  $\delta$ ): 0.97 (t,  $J = 7.0$  Hz, 5- $\text{COOCH}_2\text{CH}_3$ , 3H), 1.07 (t,  $J = 7.0$  Hz, 3- $\text{COOCH}_2\text{CH}_3$ , 3H), 1.45 (d,  $J = 7.0$  Hz, 6- $\text{CH}_3$ , 3H), 2.09 (d,  $J = 2.1$  Hz, 2- $\text{CH}_3$ , 3H), 3.41 (dd,  $J = 13.3$  & 9.8 Hz, 5-H, 1H), 3.85 (m,  $J = 9.8$  & 7.0 & 2.1 Hz, 6-H, 1H), 3.95 (AB m,  $J = 7.0$  Hz, 5- $\text{COOCH}_2\text{CH}_3$ , 2H), 3.98 (q,  $J = 7.0$  Hz, 3- $\text{COOCH}_2\text{CH}_3$ , 2H), 4.06 (d,  $J = 13.3$  Hz, 4-H, 1H), 7.20 (m, ArH, 5H), 9.43 (bs, OOH, 1H) ppm.

$^{13}\text{C}$  NMR (50 MHz,  $\text{CDCl}_3$ ,  $\delta$ ): 13.67 (5- $\text{COOCH}_2\text{CH}_3$ ), 13.83 (3- $\text{COOCH}_2\text{CH}_3$ ), 21.60 (6- $\text{CH}_3$ ), 21.66 (2- $\text{CH}_3$ ), 43.71 (4-C), 49.01 (5-C), 56.67 (6-C), 60.64 (5- $\text{COOCH}_2\text{CH}_3$ ), 62.00 (3- $\text{COOCH}_2\text{CH}_3$ ), 87.85 (3-C), 127.58 & 127.99 & 128.86 & 135.92 (ArC), 163.78 (2-C), 166.28 (3- $\text{COOCH}_2\text{CH}_3$ ), 172.63 (5- $\text{COOCH}_2\text{CH}_3$ ) ppm.

Anal. Calcd for  $\text{C}_{19}\text{H}_{25}\text{NO}_6$ : C, 62.80; H, 6.93; N, 3.85. Found: C, 62.87; H, 6.87; N, 3.86. Mp 126-127 °C.

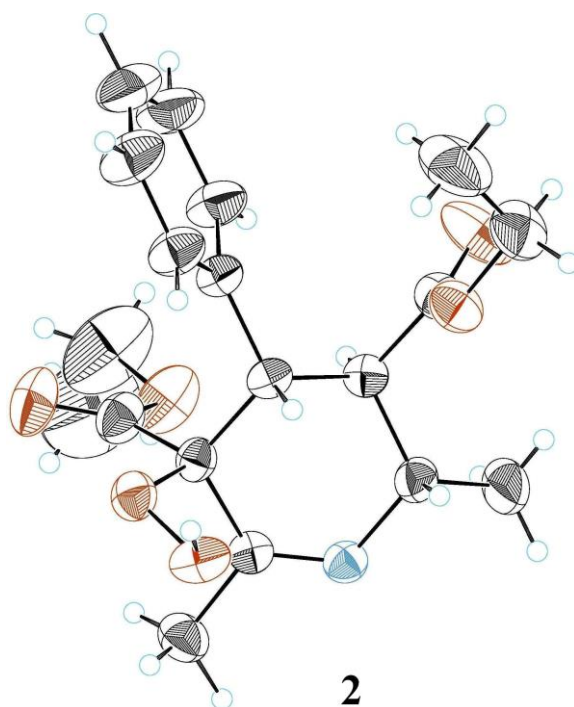

X-ray structure (CCDC 667861)

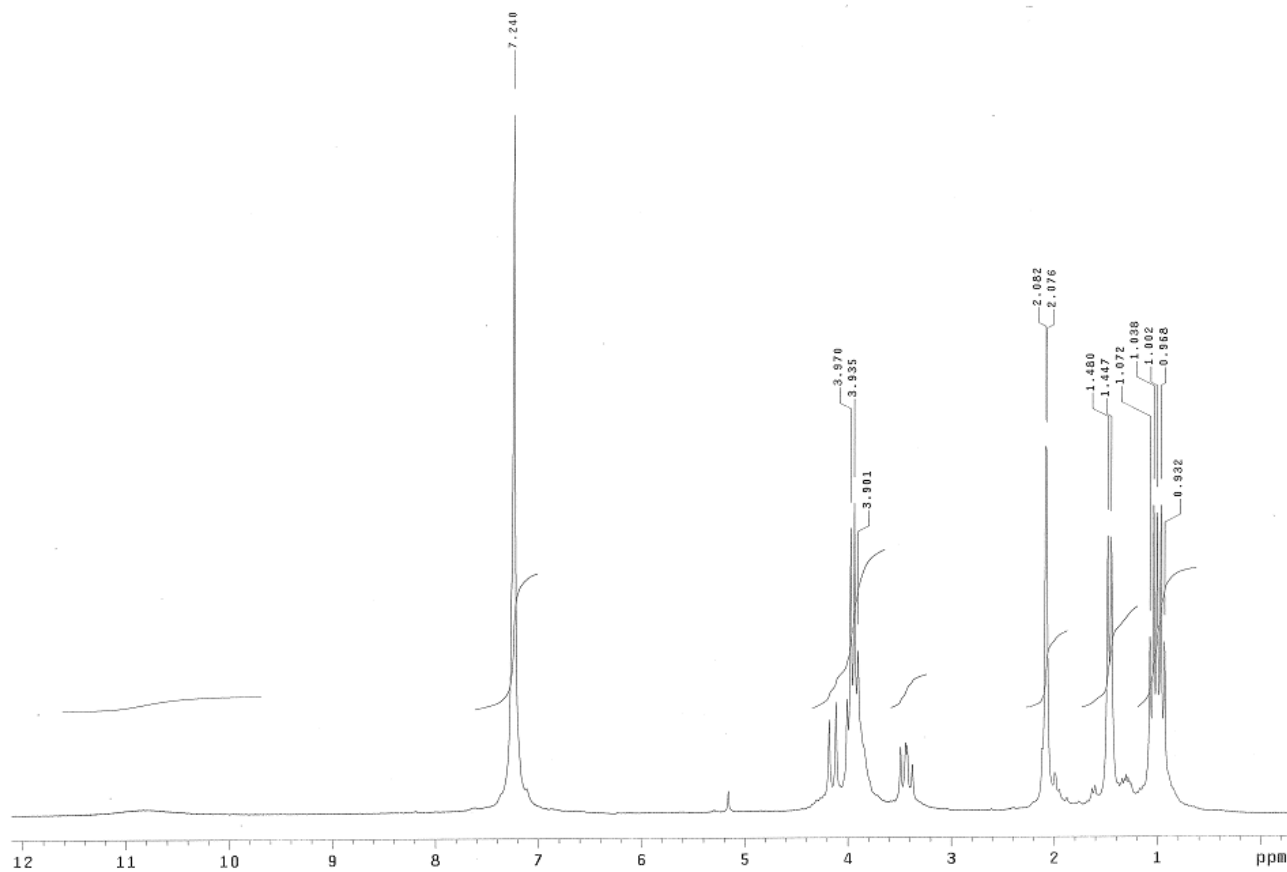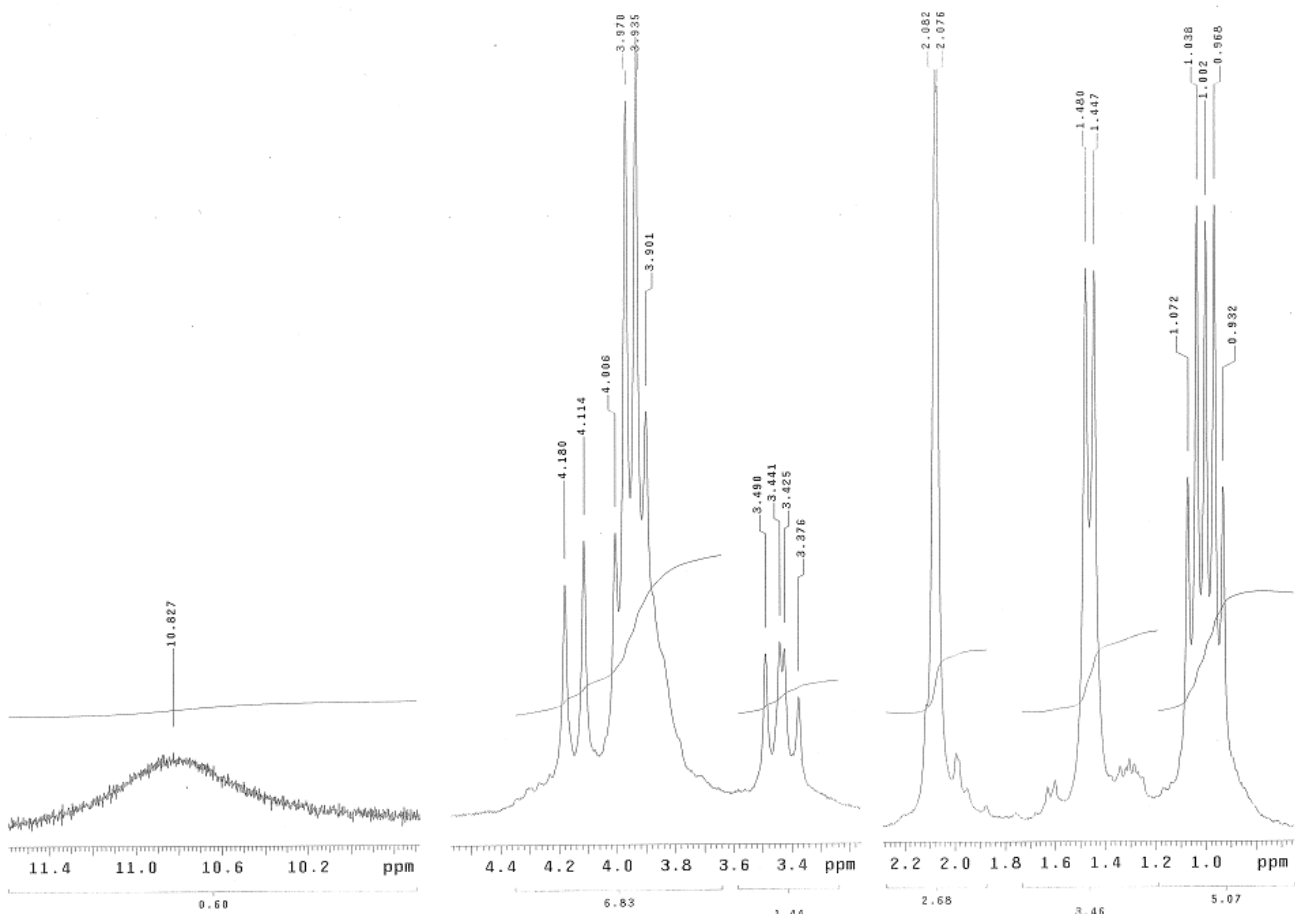

$^1\text{H}$  NMR spectra in  $\text{CDCl}_3$  of **2**

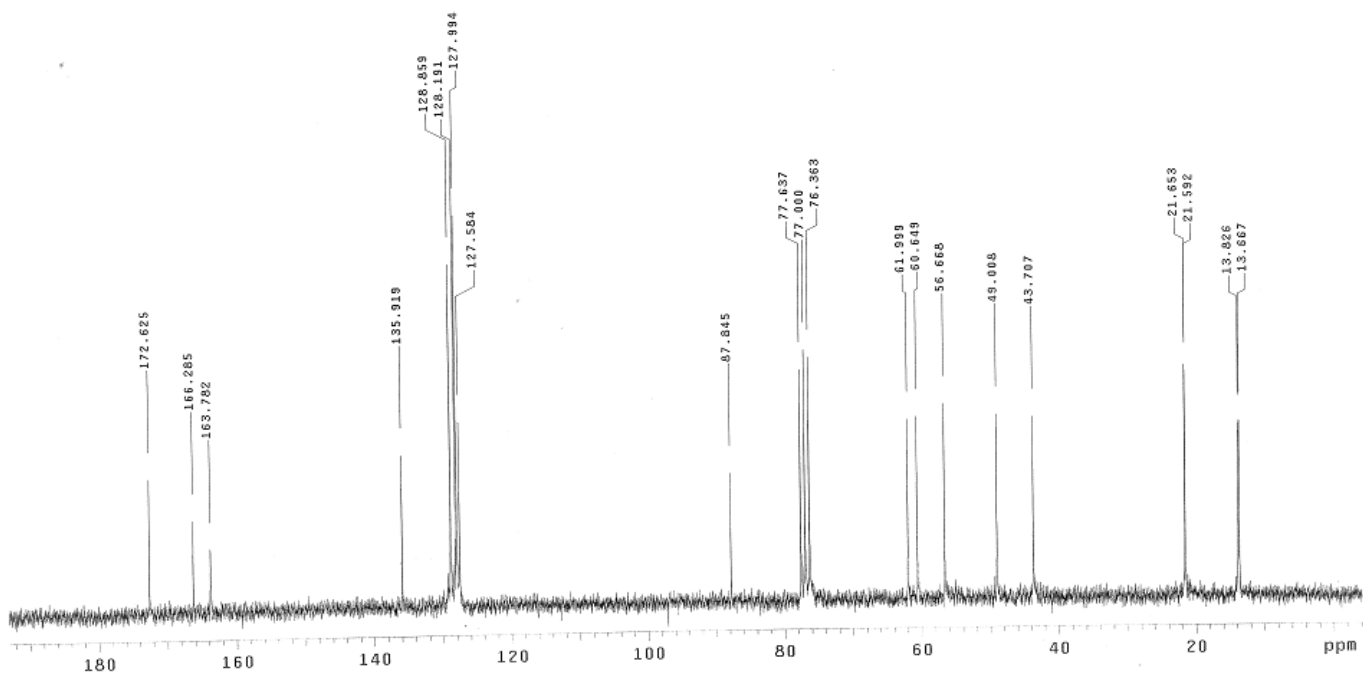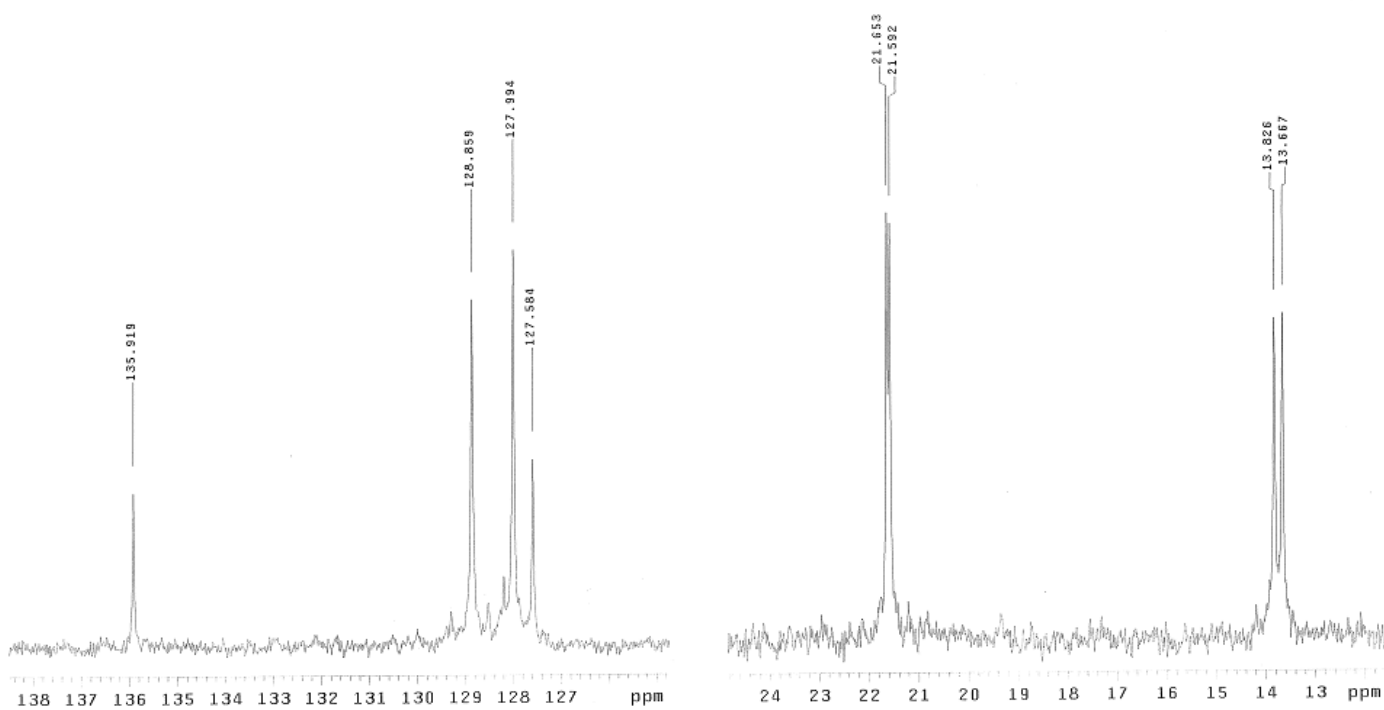

<sup>13</sup>C NMR spectra in CDCl<sub>3</sub> of 2

## II Oxidation of 1 in air saturated solutions

1.13955 g (3.44 mmol) of 3,5-diethoxycarbonyl-2,6-dimethyl-4-phenyl-1,2,3,4-tetrahydropyridine (**1**) was dissolved in 50 mL CDCl<sub>3</sub>. The solution was stirred in a opened glass flask exposed to the direct sunlight. The reaction was controlled by <sup>1</sup>H NMR spectroscopy. After completion of the reaction (*t* ~ 1 h) the solvent was evaporated, the crude product was charged on a silica gel (0.035–0.07 mm Acros Organics) column (h = 28 cm, d = 2 cm) and eluted using chloroform/petroleum ether/acetone (9:7:1); 10 mL fractions were collected. Combined fractions 12–18 following after the dead volume (110 mL) contained 0.29315 g (0.81 mmol) of pure 3,5-diethoxycarbonyl-2,6-dimethyl-3-hydroxy-4-phenyl-1,2-epoxypiperidine (**4**) which was concentrated in vacuum to obtain a white solid. Single crystals suitable for X-ray diffraction analysis were obtained by slow evaporation of a hexane solution.

Fractions 21–30 that contained a mixture of 3,5-diethoxycarbonyl-2,6-dimethyl-3-hydroxy-4-phenyl-3,4,5,6-tetrahydropyridine (**3**) and *N*-acetyl-2,4-diethoxycarbonyl-2-hydroxy-4-methyl-3-phenylpyrrolidine (**5**) were combined and after solvent removal (rotary evaporator) a pale yellow oil (0.8377 g) was obtained. Pure **5** was isolated from the oil by crystalization from diethyl ether/hexane. The white precipitate 0.44530 g (1.23 mmol) was removed by filtration. Crystals for X-ray diffraction analysis were grown from hexane.

The filtrate containing a mixture of 3,5-diethoxycarbonyl-2,6-dimethyl-3-hydroxy-4-phenyl-3,4,5,6-tetrahydropyridine (**3**) and *N*-acetyl-2,4-diethoxycarbonyl-2-hydroxy-4-methyl-3-phenylpyrrolidine (**5**) was concentrated in vacuum and analysed by 1D and 2D NMR spectra.

The isolation of the products is the same if ethyl acetate/hexane (1:1) was used as an eluent (**4** R<sub>f</sub> 0.48; **3** R<sub>f</sub> 0.16; **5** R<sub>f</sub> 0.15) for column chromatography.

### 3,5-Diethoxycarbonyl-2,6-dimethyl-3-hydroxy-4-phenyl-3,4,5,6-tetrahydropyridine (**3**)

<sup>1</sup>H NMR (500 MHz, CDCl<sub>3</sub>, δ): 0.94 (t, *J* = 7.0 Hz, 5-COOCH<sub>2</sub>CH<sub>3</sub>, 3H), 1.36 (t, *J* = 7.0 Hz, 3-COOCH<sub>2</sub>CH<sub>3</sub>, 3H), 1.46 (d, *J* = 7.3 Hz, 6-CH<sub>3</sub>, 3H), 1.95 (d, *J* = 2.1 Hz, 2-CH<sub>3</sub>, 3H), 3.43 (dd, *J* = 13.4 & 9.5 Hz, 5-H, 1H), 3.51 (d, *J* = 13.4 Hz, 4-H, 1H), 3.78 (s, OH, 1H), 3.94 (m, *J* = 9.5 & 7.3 & 2.1 Hz, 6-H, 1H), 3.96 (AB m, *J* = 7.0 Hz, 5-COOCH<sub>2</sub>CH<sub>3</sub>, 2H), 4.20 (AB m, *J* = 7.0 Hz, 3-COOCH<sub>2</sub>CH<sub>3</sub>, 2H), 7.20 (m, ArH, 5H) ppm.

<sup>13</sup>C NMR (125 MHz, CDCl<sub>3</sub>, δ): 13.6 (5-COOCH<sub>2</sub>CH<sub>3</sub>), 13.8 (3-COOCH<sub>2</sub>CH<sub>3</sub>), 21.7 (6-CH<sub>3</sub>), 21.9 (2-CH<sub>3</sub>), 49.3 (5-C), 49.8 (4-C), 56.8 (6-C), 60.4 (5-COOCH<sub>2</sub>CH<sub>3</sub>), 63.2 (3-COOCH<sub>2</sub>CH<sub>3</sub>), 77.3 (3-C), 129.0 & 129.5 & 135 (ArC), 162.8 (2-C), 170.8 (3-COOCH<sub>2</sub>CH<sub>3</sub>), 171.9 (5-COOCH<sub>2</sub>CH<sub>3</sub>) ppm.

IR (dry film,  $\text{cm}^{-1}$ ): 3490 (br), 1730 (s), 1670 (m).

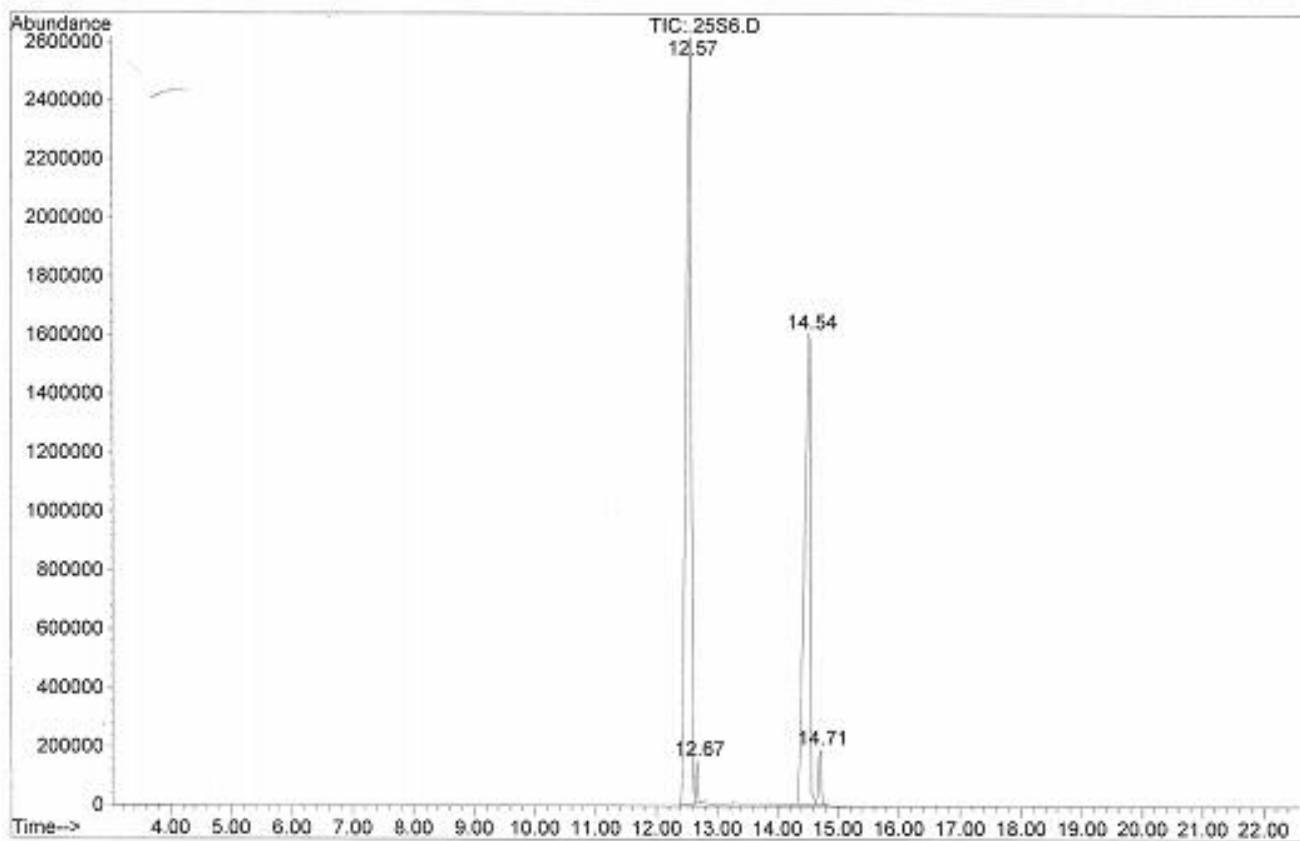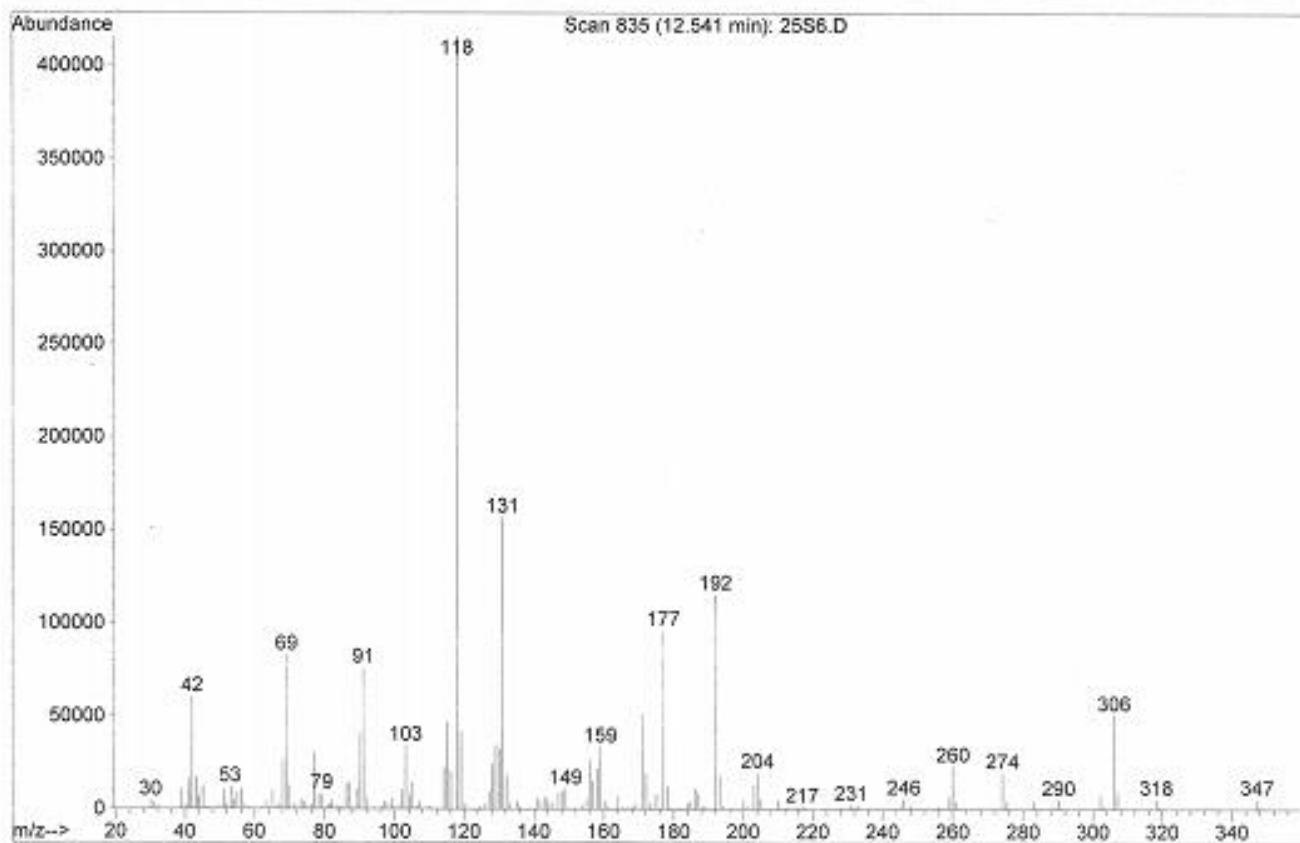

GC-MS spectrum of **3** and **5**

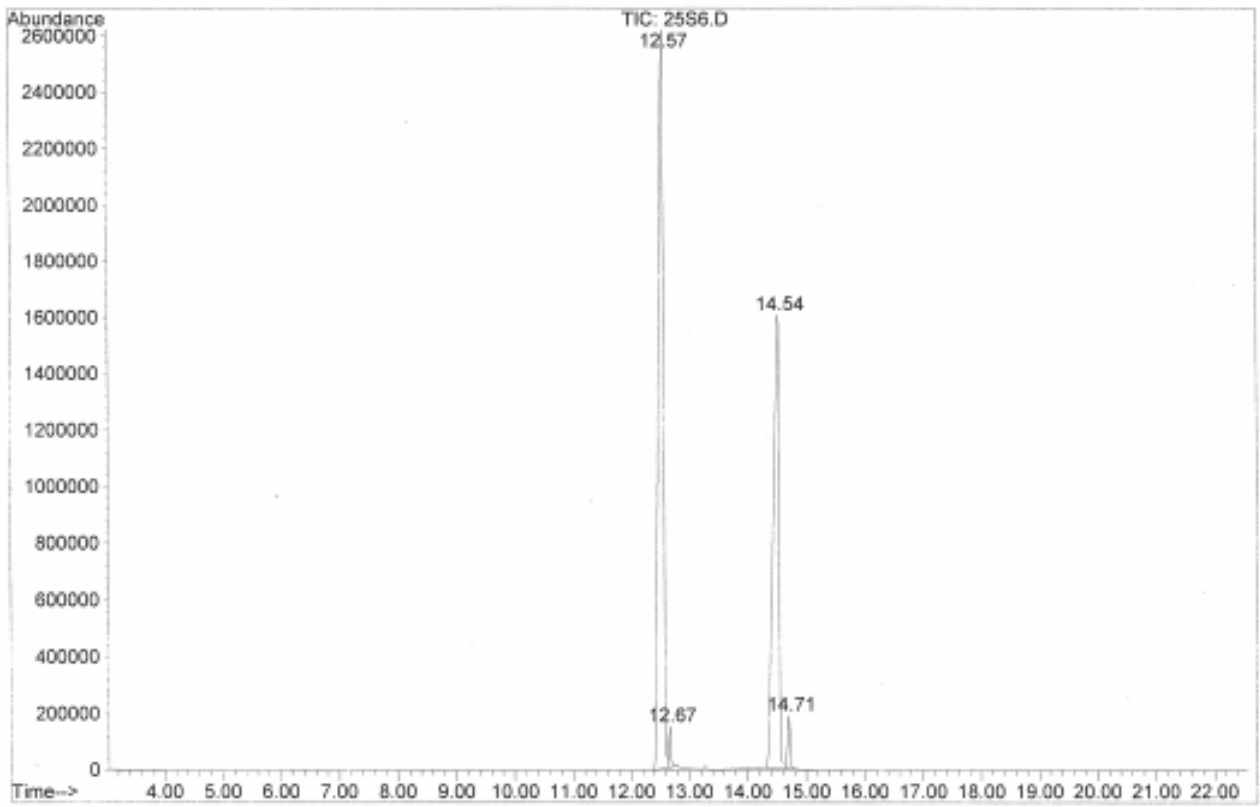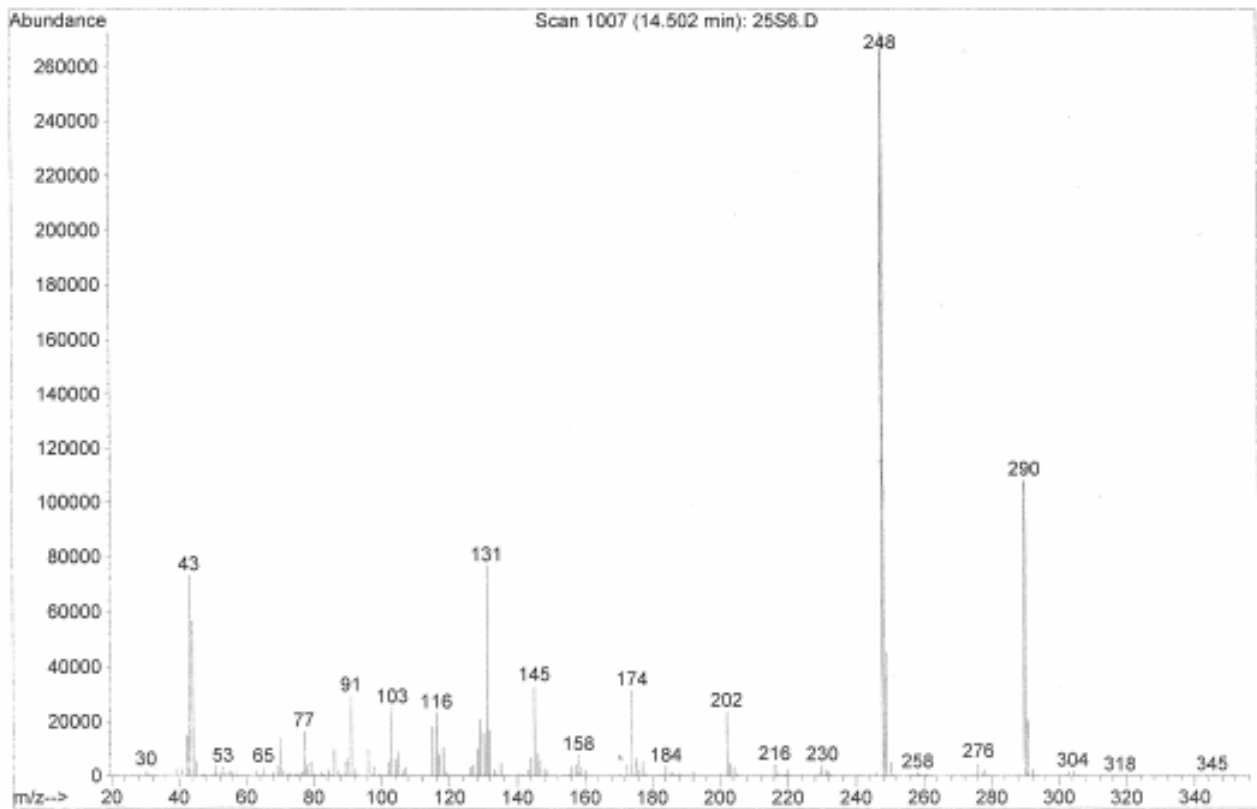

GC-MS spectrum of **3** and **5**



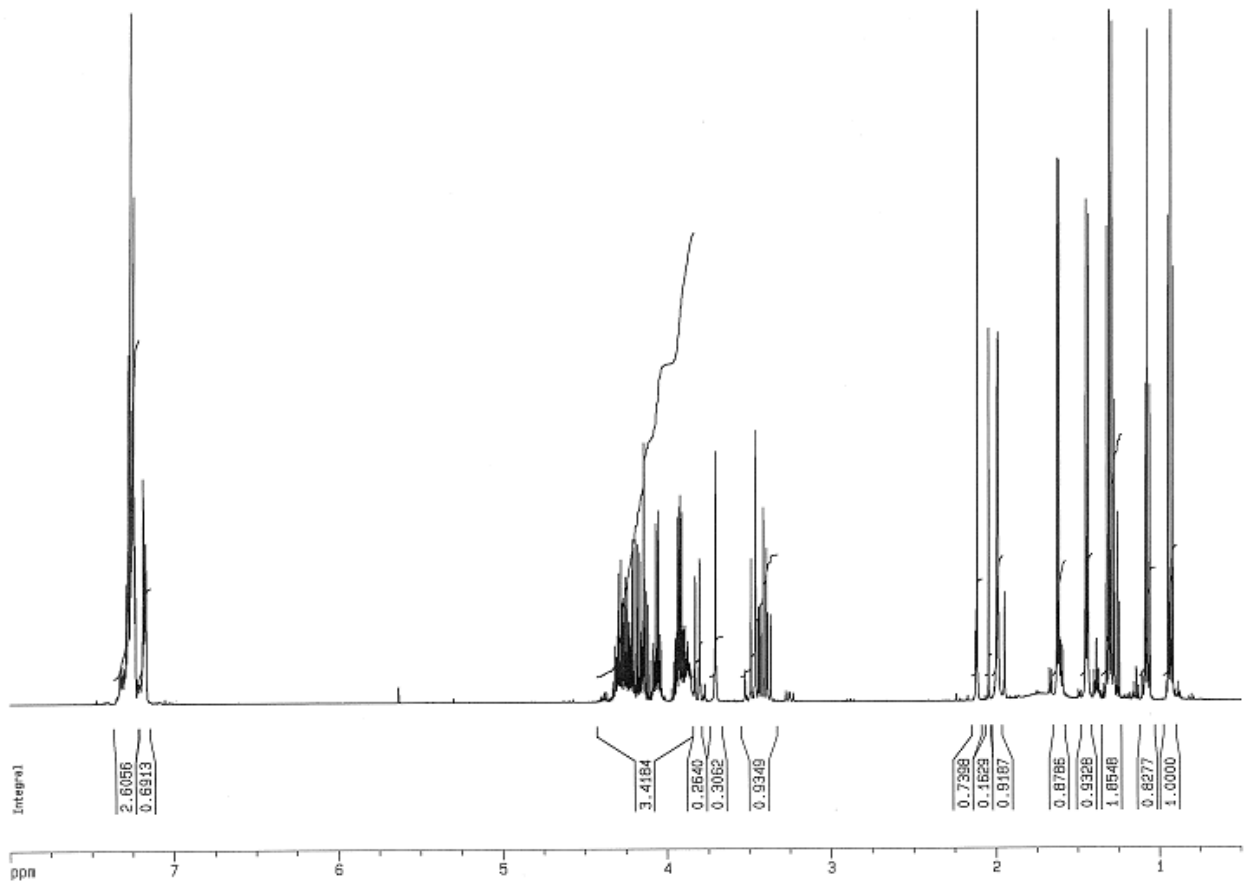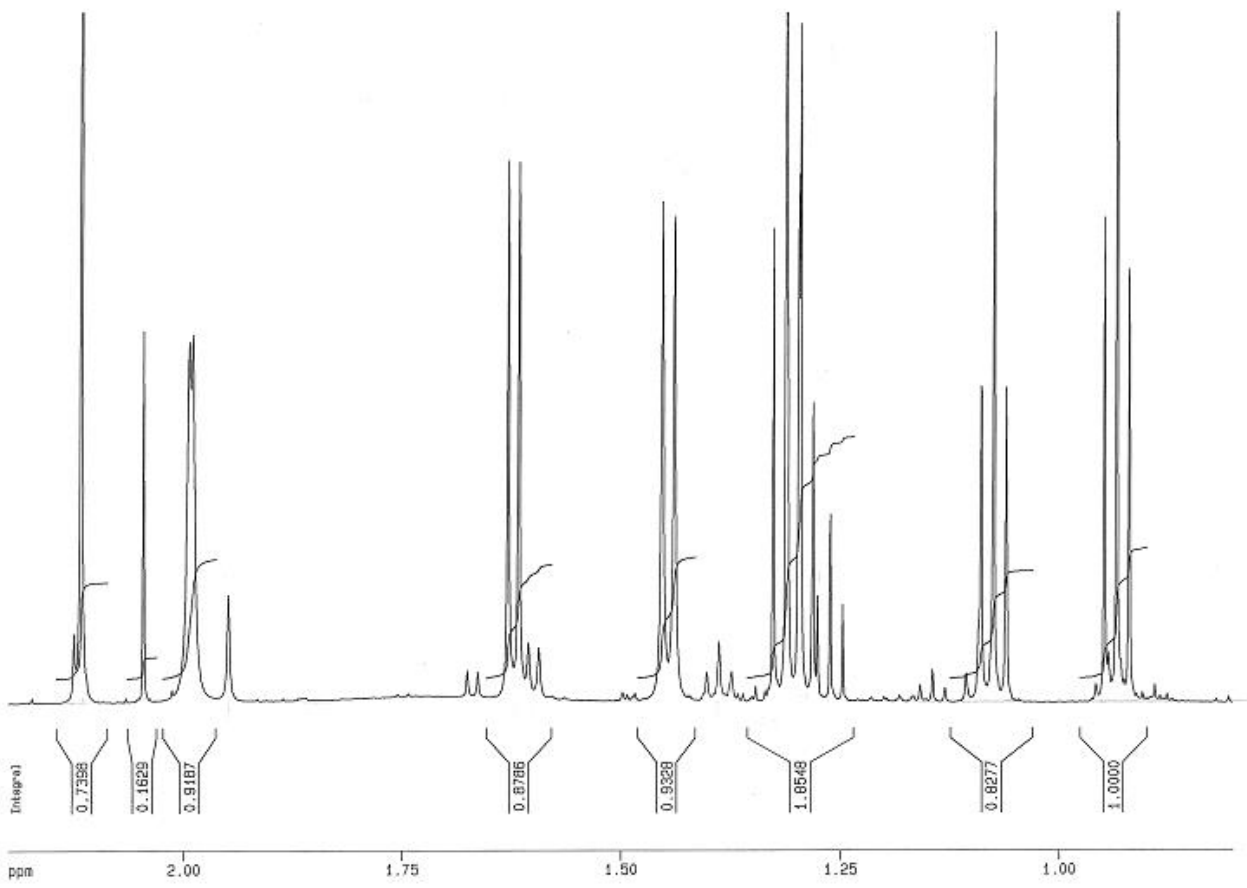

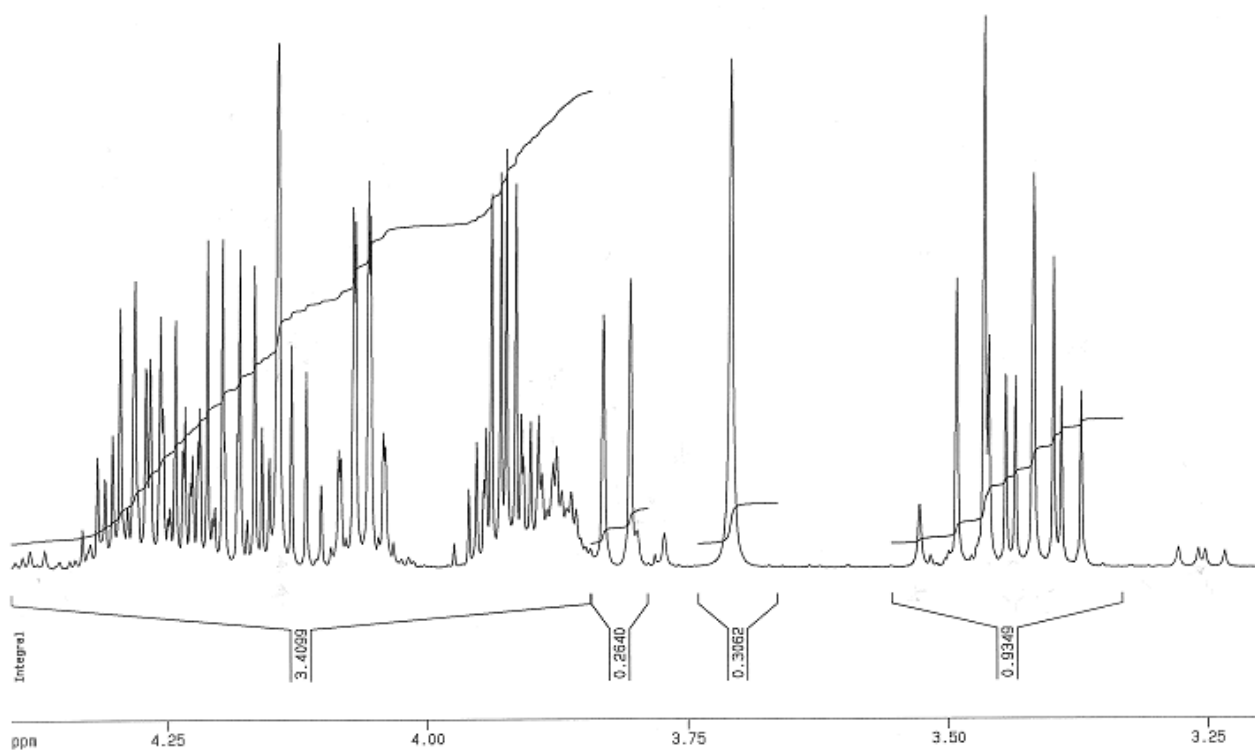

$^1\text{H}$  NMR spectra in  $\text{CDCl}_3$  of **3** and **5**

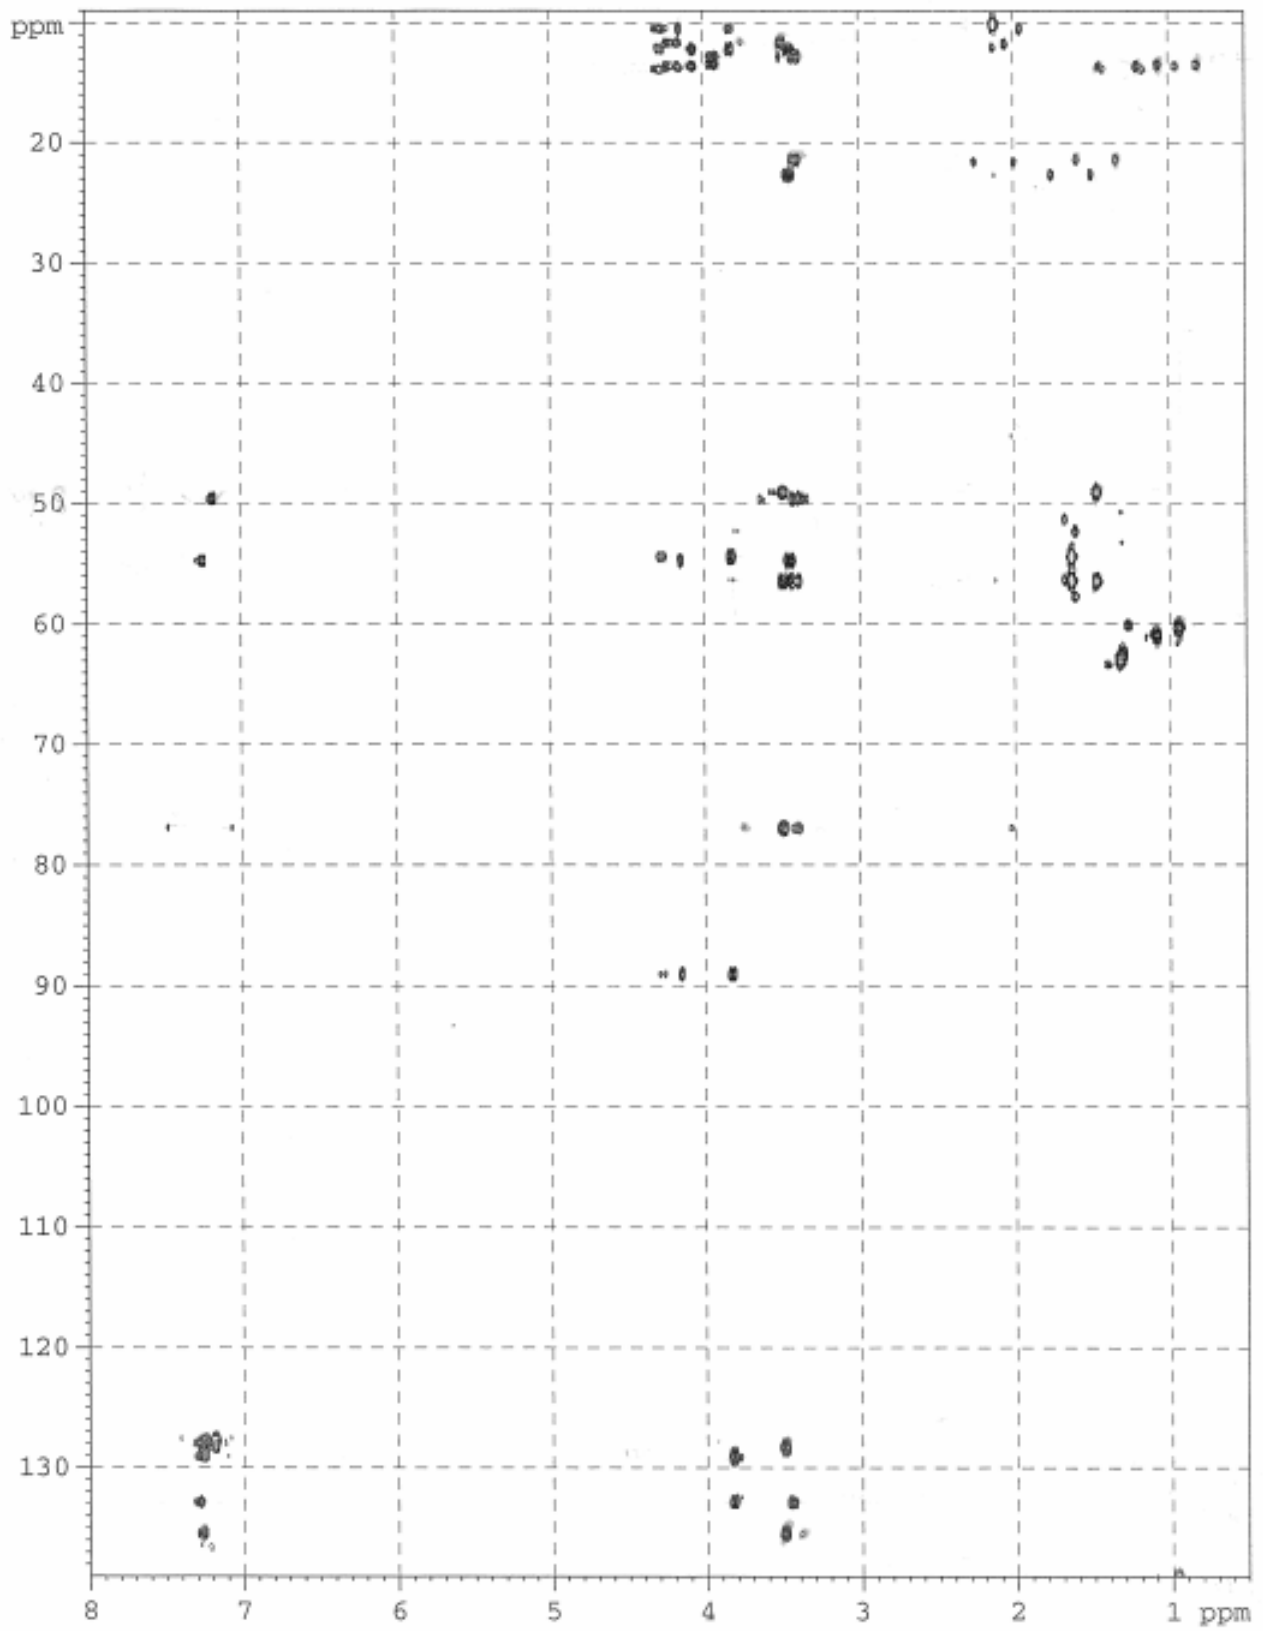

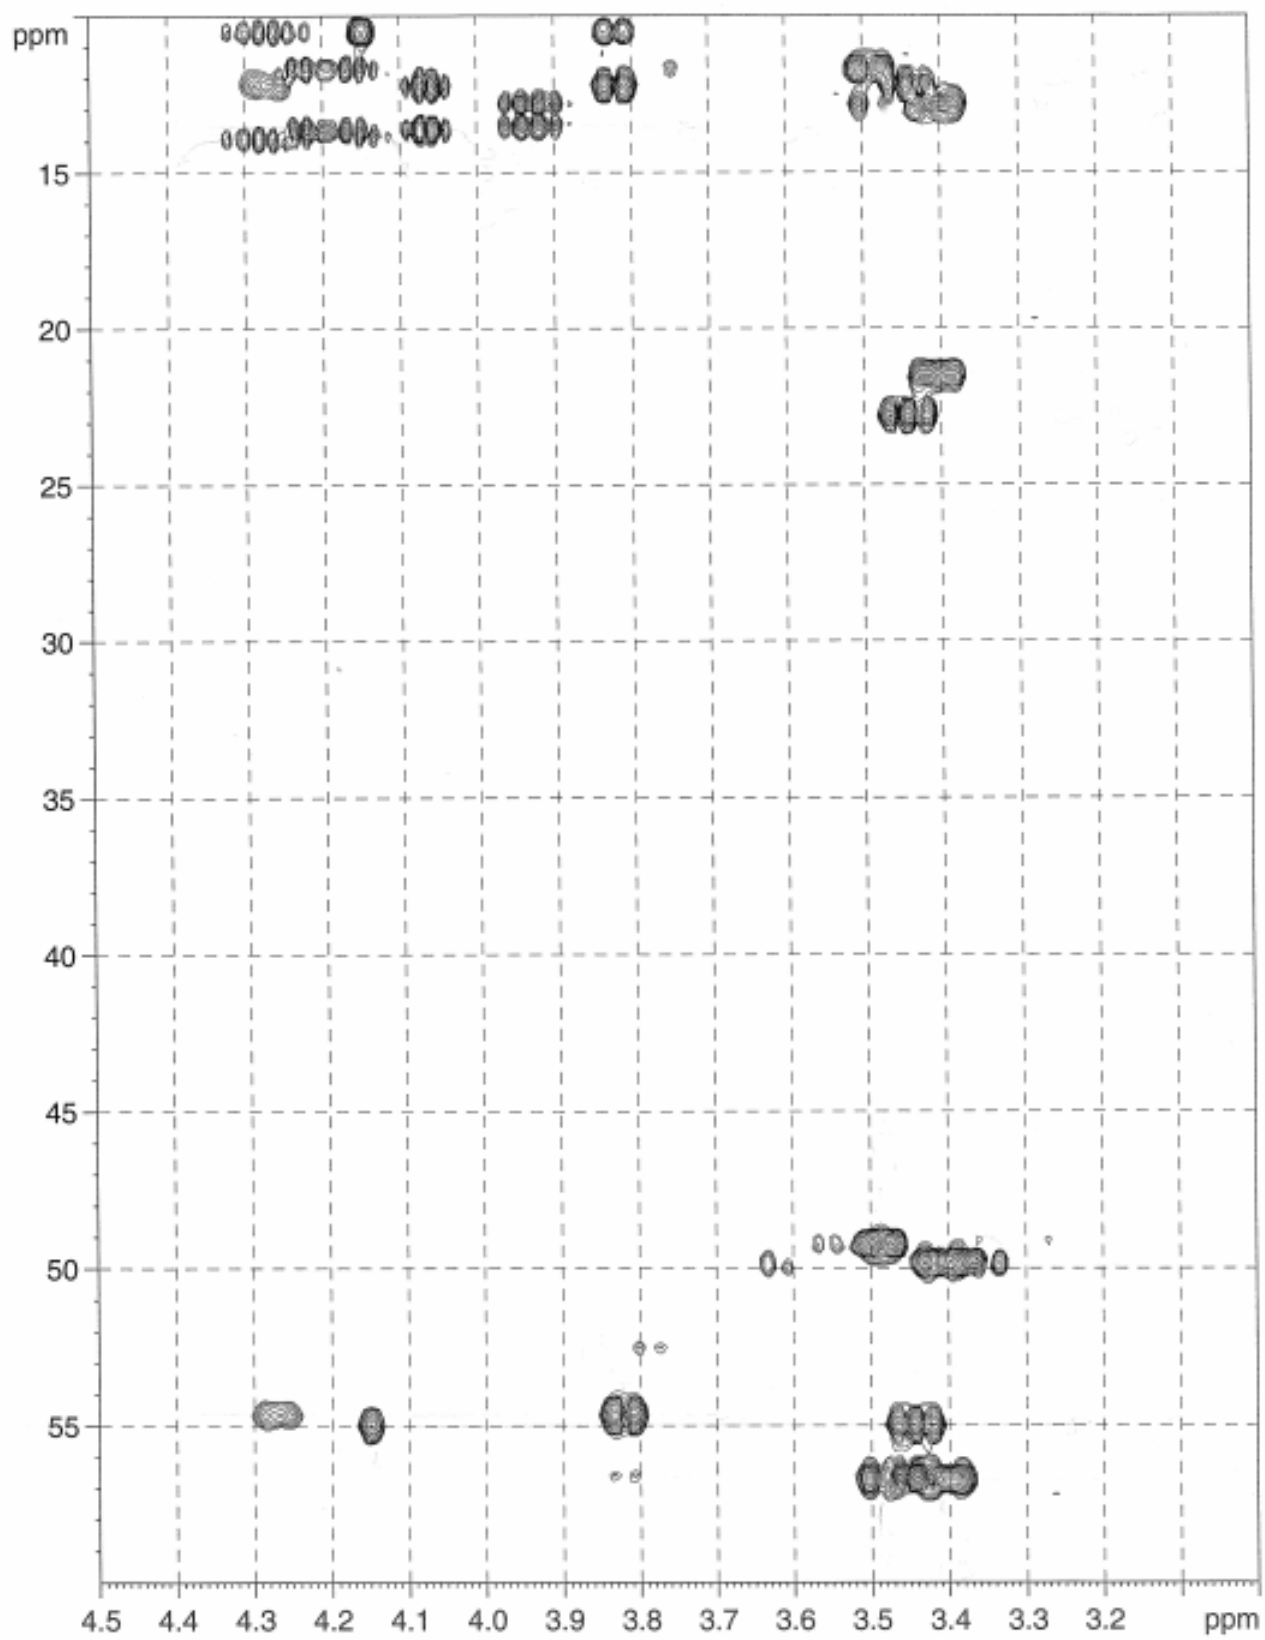

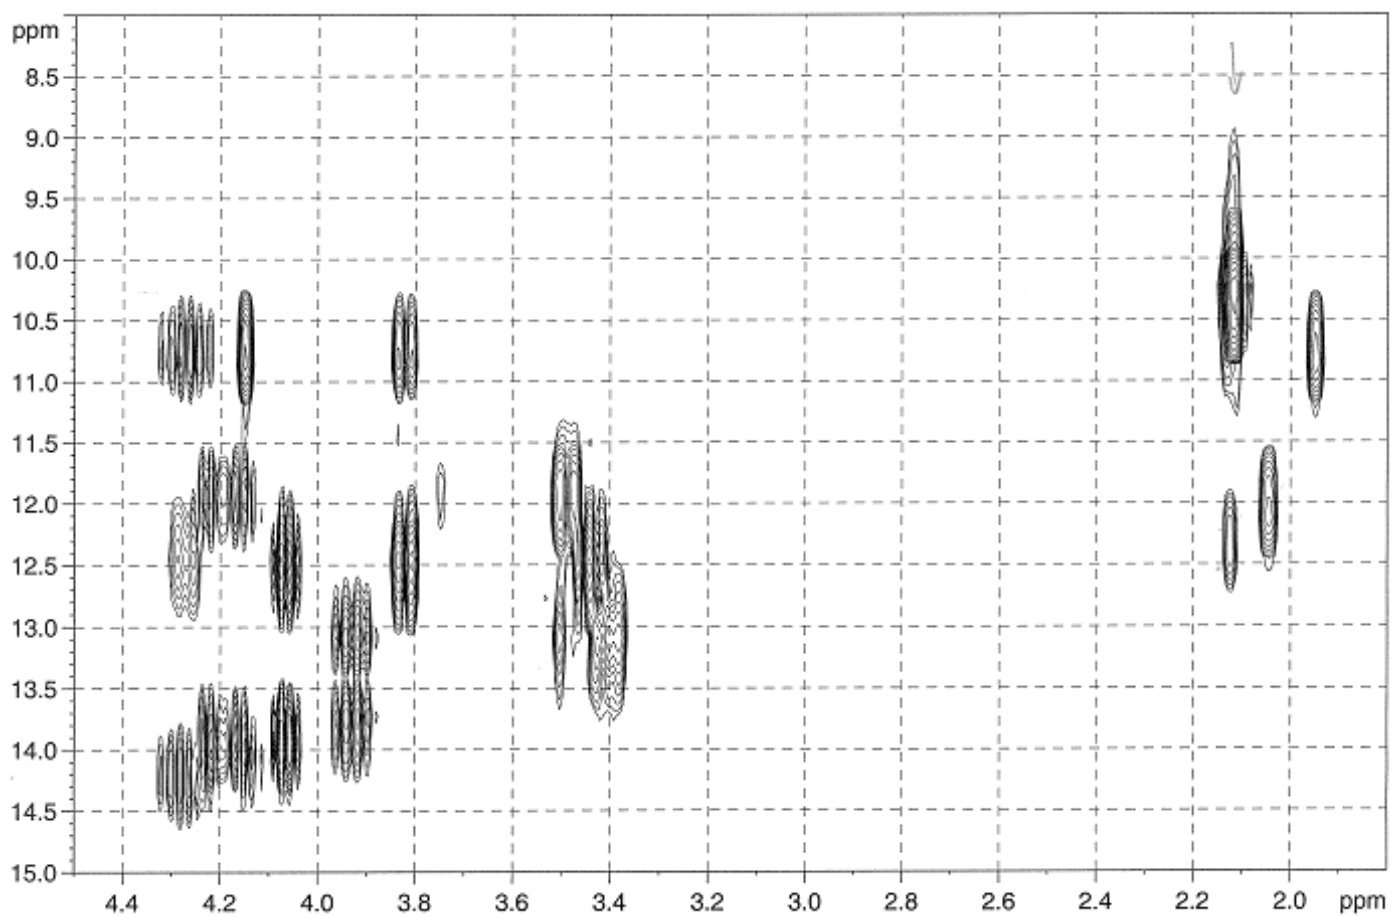

HMBC spectra in  $\text{CDCl}_3$  of **3** and **5**

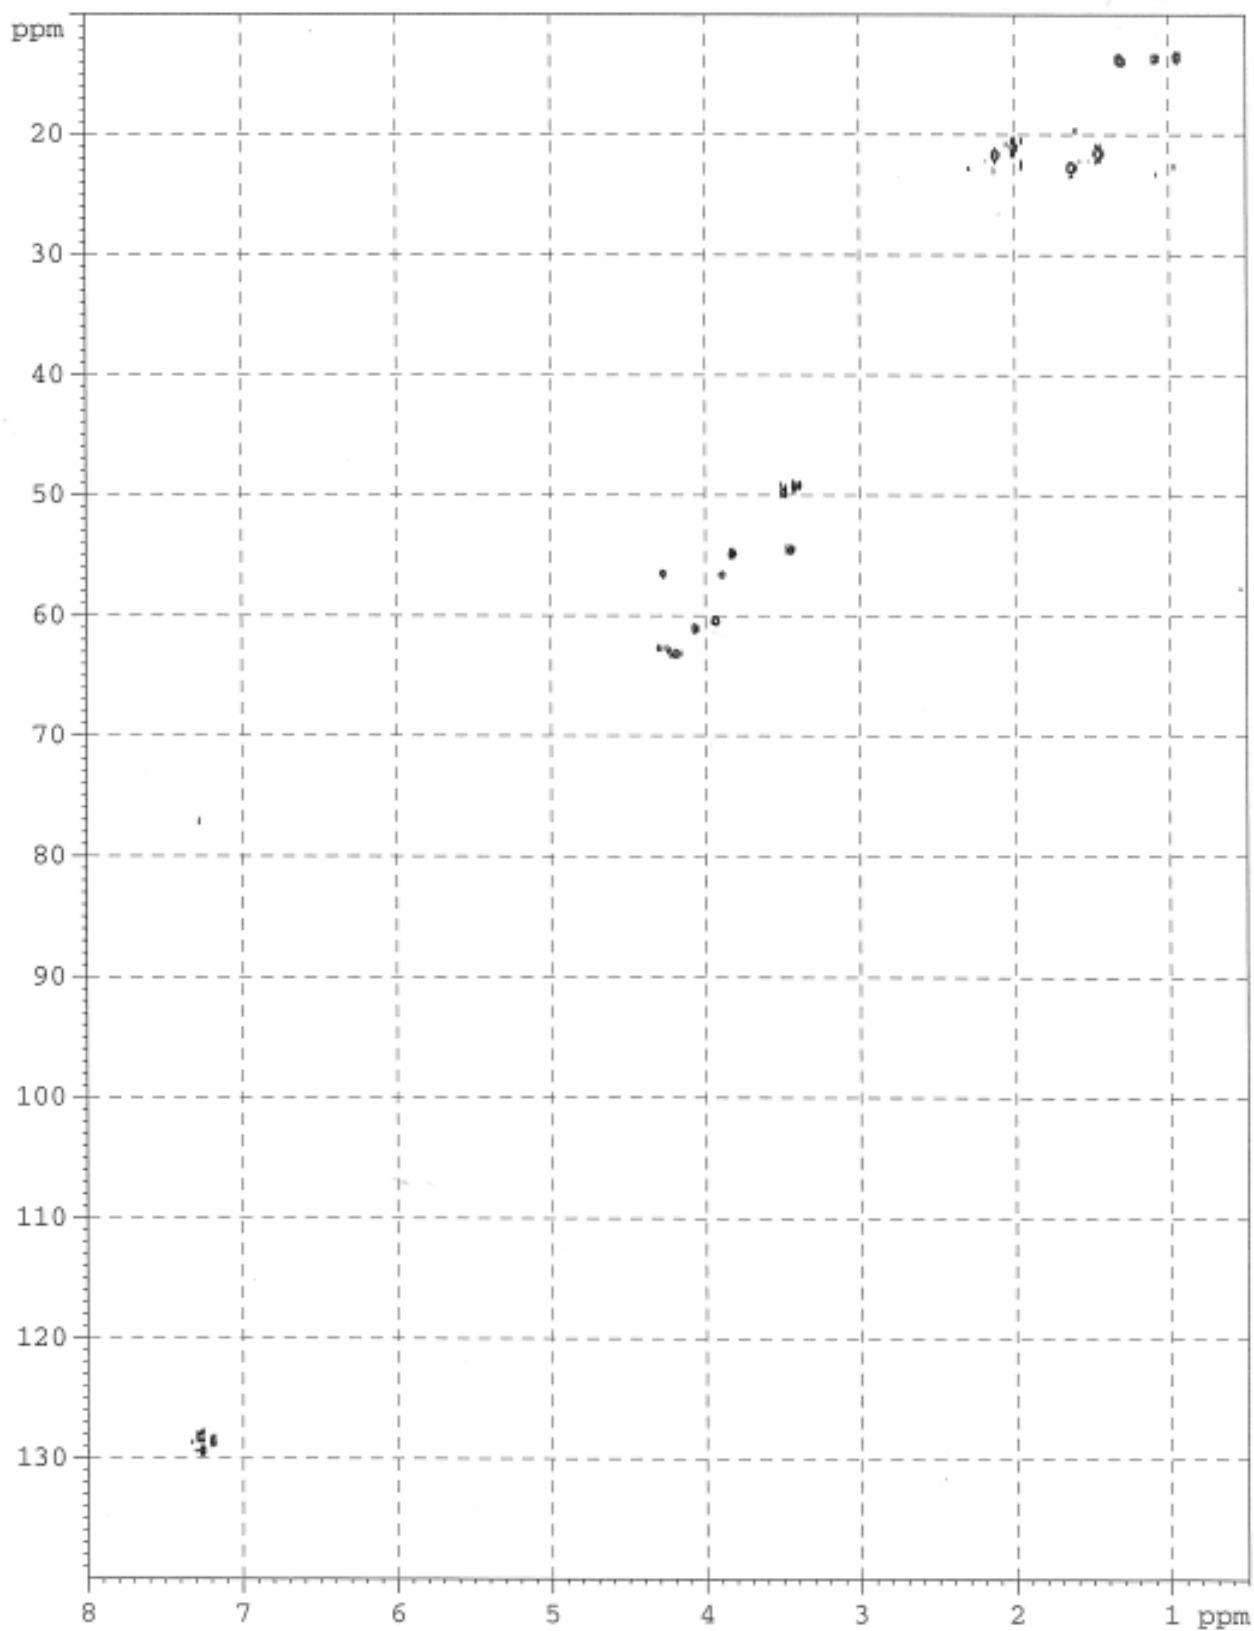

HSQC spectrum in CDCl<sub>3</sub> of **3** and **5**

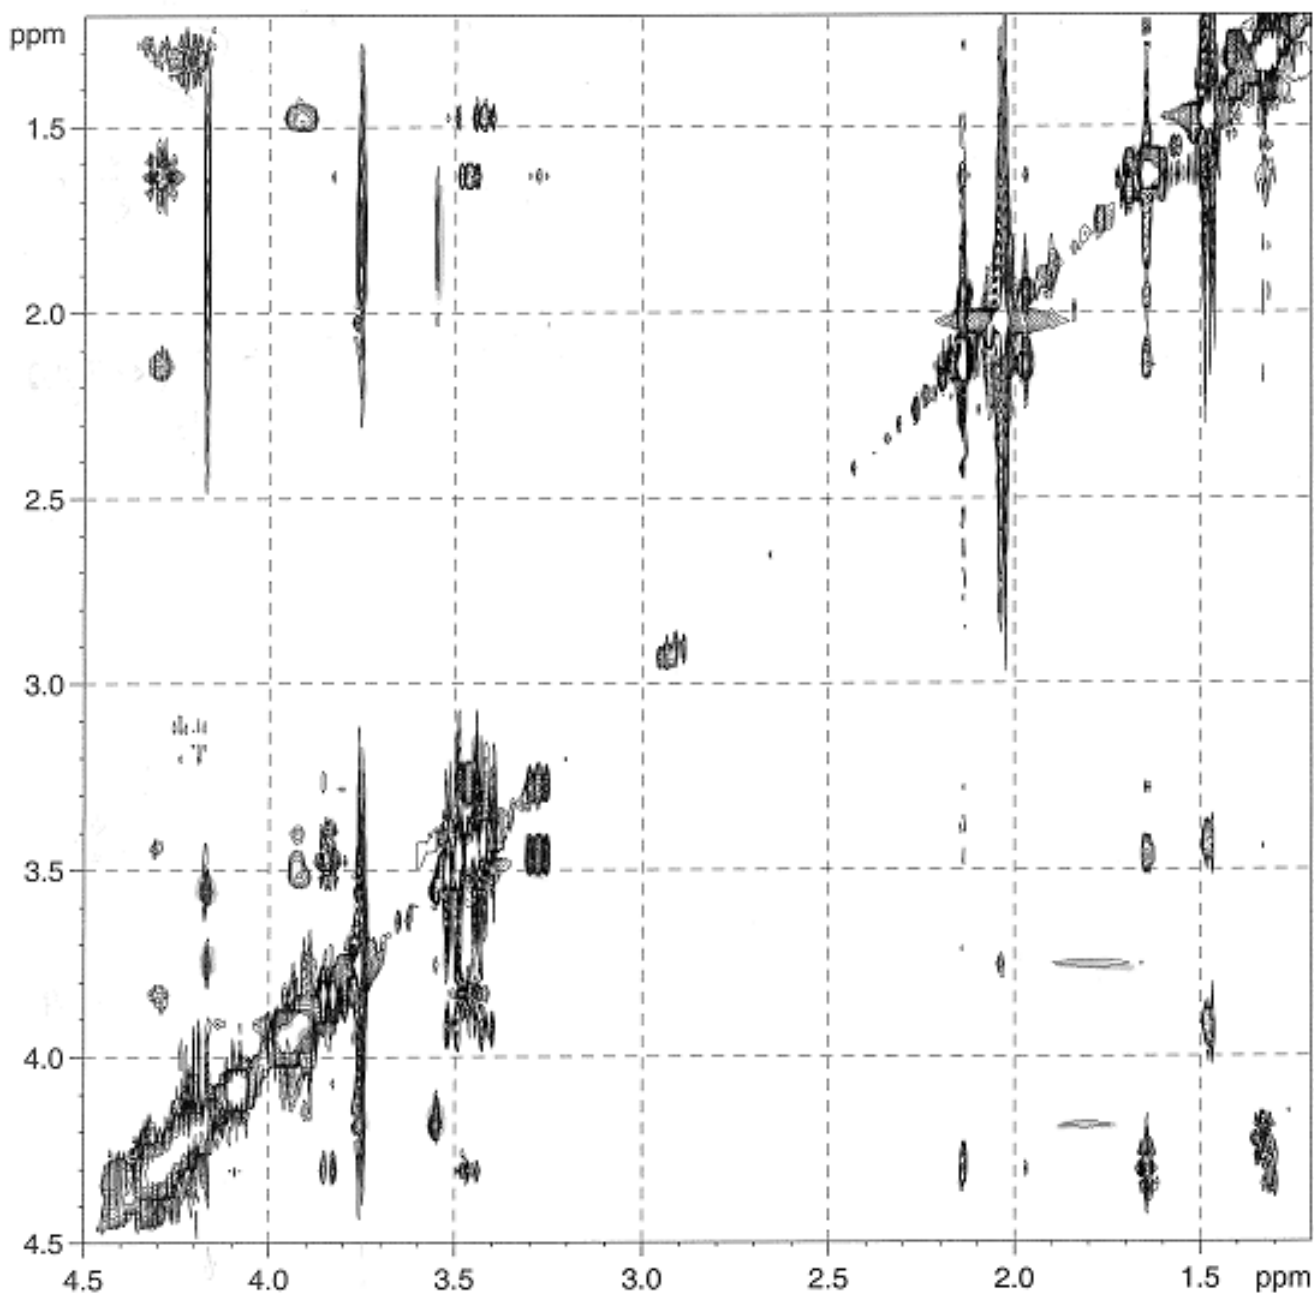

NOESY spectrum in CDCl<sub>3</sub> of **3** and **5**

### 3,5-Diethoxycarbonyl-2,6-dimethyl-3-hydroxy-4-phenyl-1,2-epoxypiperidine (4)

$^1\text{H}$  NMR (500 MHz,  $\text{CDCl}_3$ ,  $\delta$ ): 0.87 (t,  $J = 7.0$  Hz, 5- $\text{COOCH}_2\text{CH}_3$ , 3H), 1.39 (t,  $J = 7.0$  Hz, 3- $\text{COOCH}_2\text{CH}_3$ , 3H), 1.45 (s, 2- $\text{CH}_3$ , 3H), 1.49 (d,  $J = 7.3$  Hz, 6- $\text{CH}_3$ , 3H), 3.28 (s, 3-OH, 1H), 3.36 (dd,  $J = 13.4$  &  $10.0$  Hz, 5-H, 1H), 3.62 (d,  $J = 13.4$  Hz, 4-H, 1H), 3.70 (dq,  $J = 10.0$  &  $7.3$  Hz, 6-H, 1H), 3.86 (AB m,  $J = 7.0$  Hz, 5- $\text{COOCH}_2\text{CH}_3$ , 2H), 4.34 (q,  $J = 7.0$  Hz, 3- $\text{COOCH}_2\text{CH}_3$ , 2H), 7.12 (d,  $J = 8.0$  Hz, ArH, 2H), 7.26 (m, ArH, 3H), 7.25 (m, 5H,  $\text{H}_{\text{arom}}$ ) ppm.

$^{13}\text{C}$  NMR (125 MHz,  $\text{CDCl}_3$ ,  $\delta$ ): 13.5 (5- $\text{COOCH}_2\text{CH}_3$ ), 13.9 (3- $\text{COOCH}_2\text{CH}_3$ ), 19.0 (2- $\text{CH}_3$ ), 20.2 (6- $\text{CH}_3$ ), 45.4 (4-C), 50.0 (5-C), 56.5 (6-C), 60.5 (5- $\text{COOCH}_2\text{CH}_3$ ), 62.9 (3- $\text{COOCH}_2\text{CH}_3$ ), 78.4 (3-C), 83.4 (2-C), 127.8 & 128.0 & 128.8 & 134.8 (ArC), 170.5 (5- $\text{COOCH}_2\text{CH}_3$ ), 170.6 (3- $\text{COOCH}_2\text{CH}_3$ ) ppm.

IR (dry film,  $\text{cm}^{-1}$ ): 3500 (br), 1740 (br).

Anal. Calcd for  $\text{C}_{19}\text{H}_{25}\text{NO}_6$ : C, 62.80; H, 6.93; N, 3.85. Found: C, 62.39; H, 6.89; N, 3.74.

Mp 76-78  $^\circ\text{C}$ .

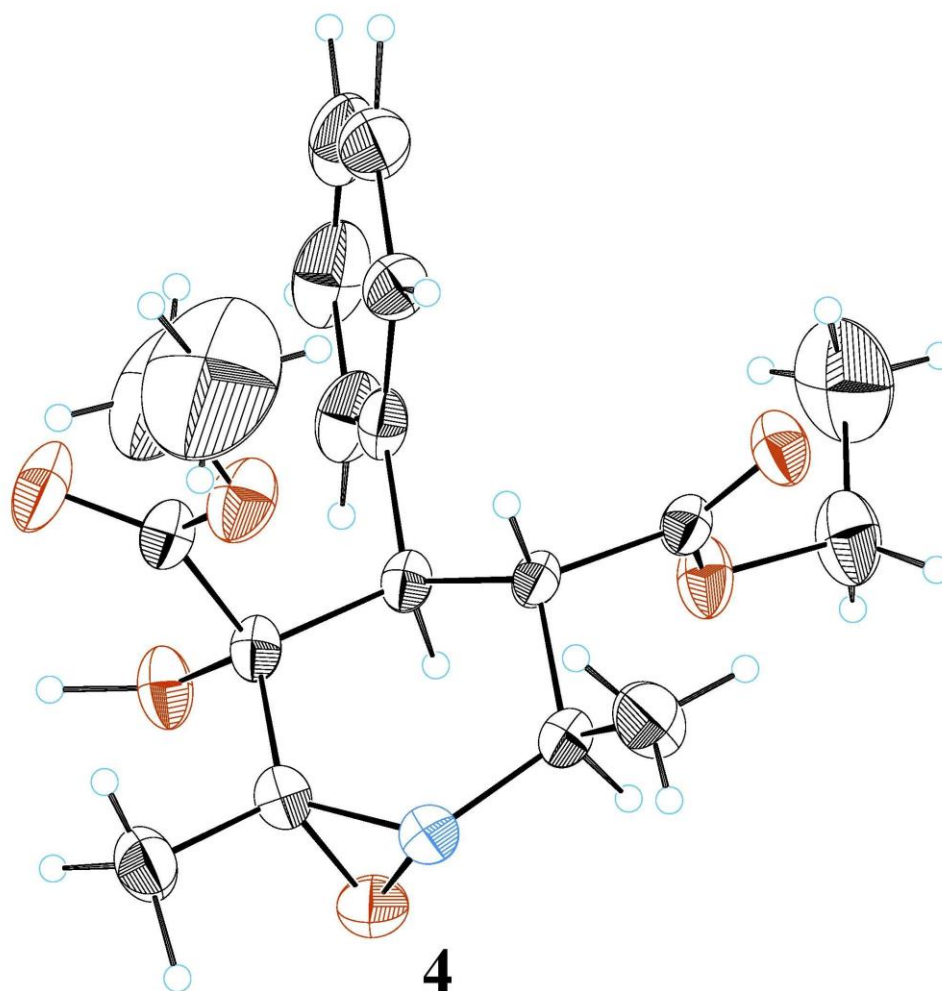

X-ray structure (CCDC 667860)



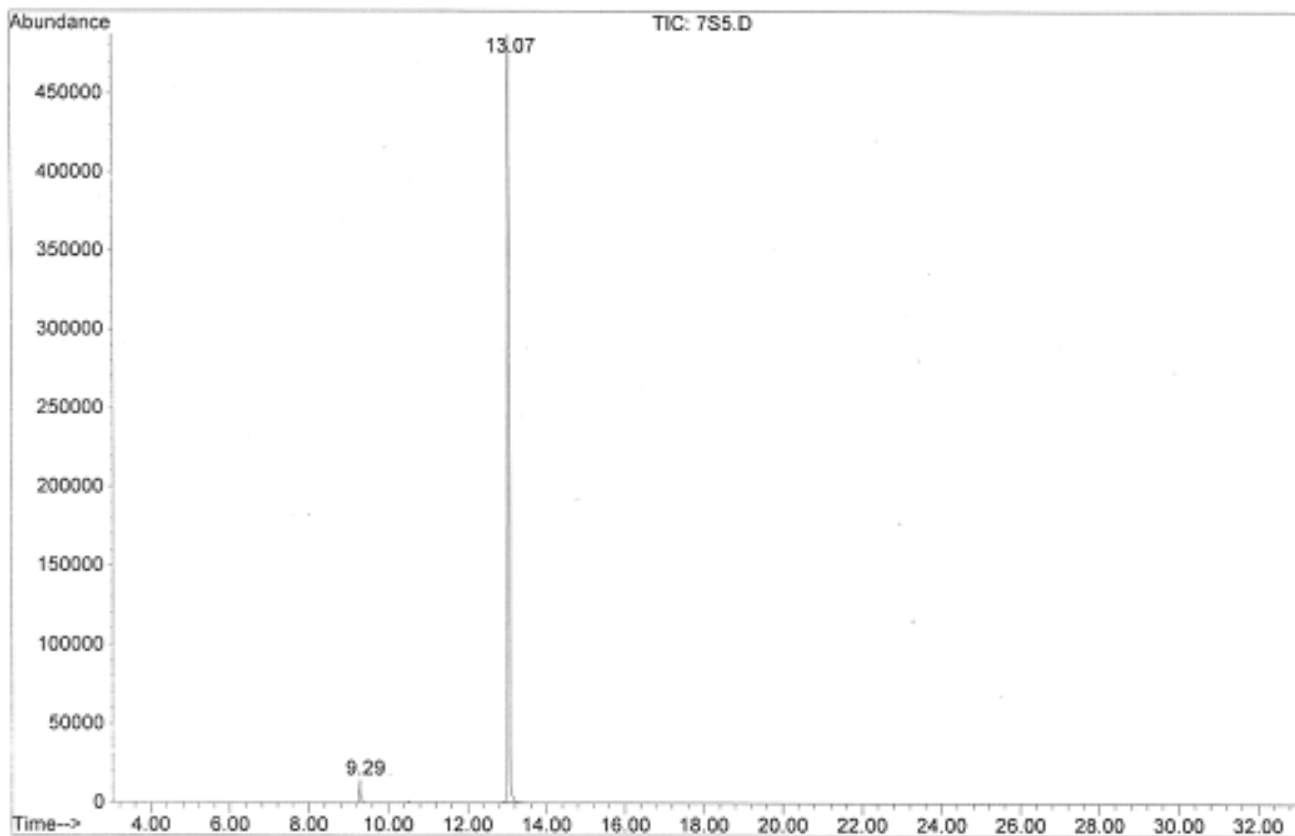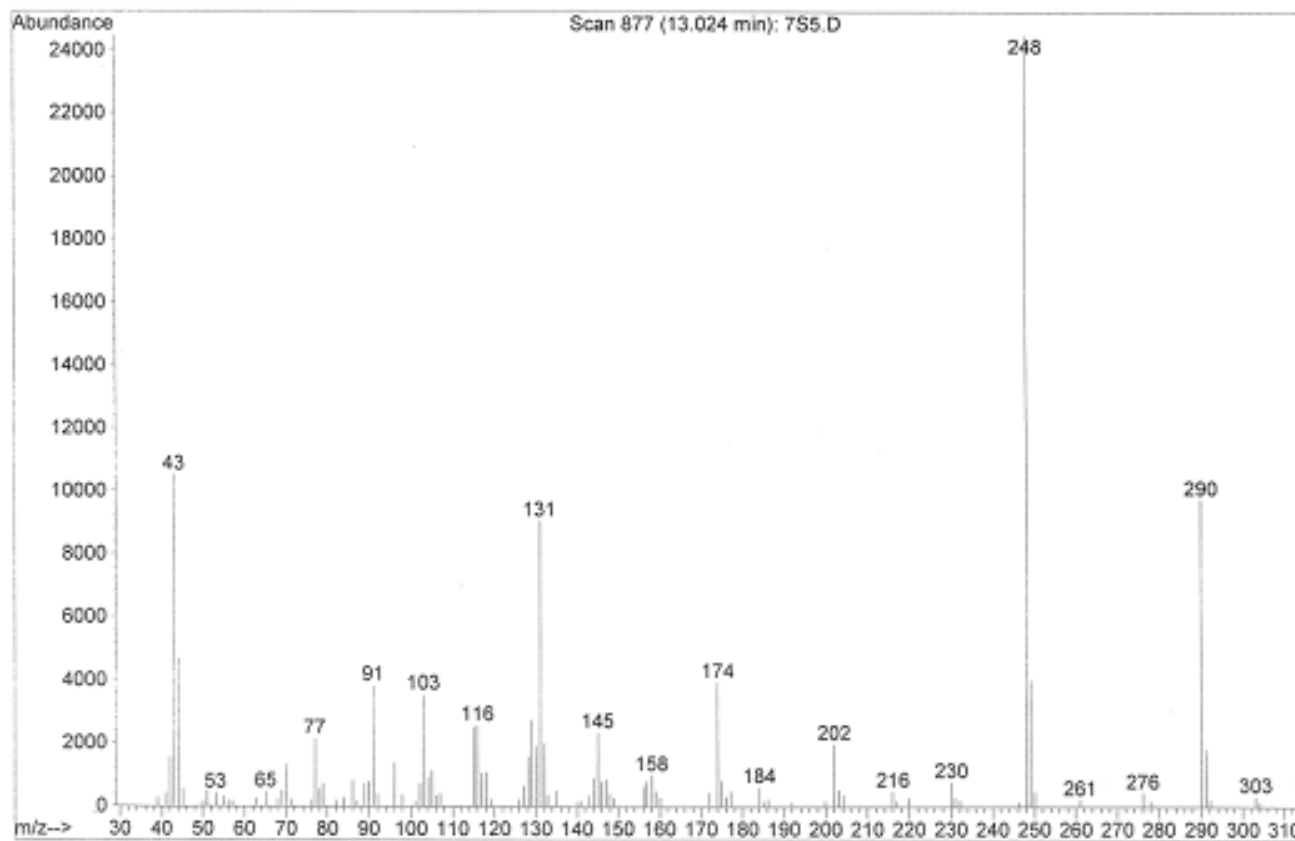

GC-MS spectrum of 4

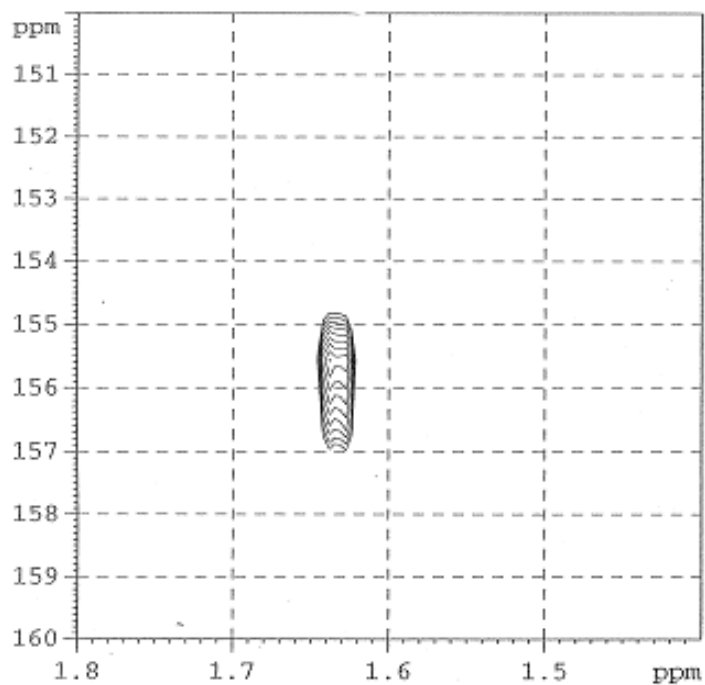

<sup>15</sup>N NMR spectrum in CDCl<sub>3</sub> of 4

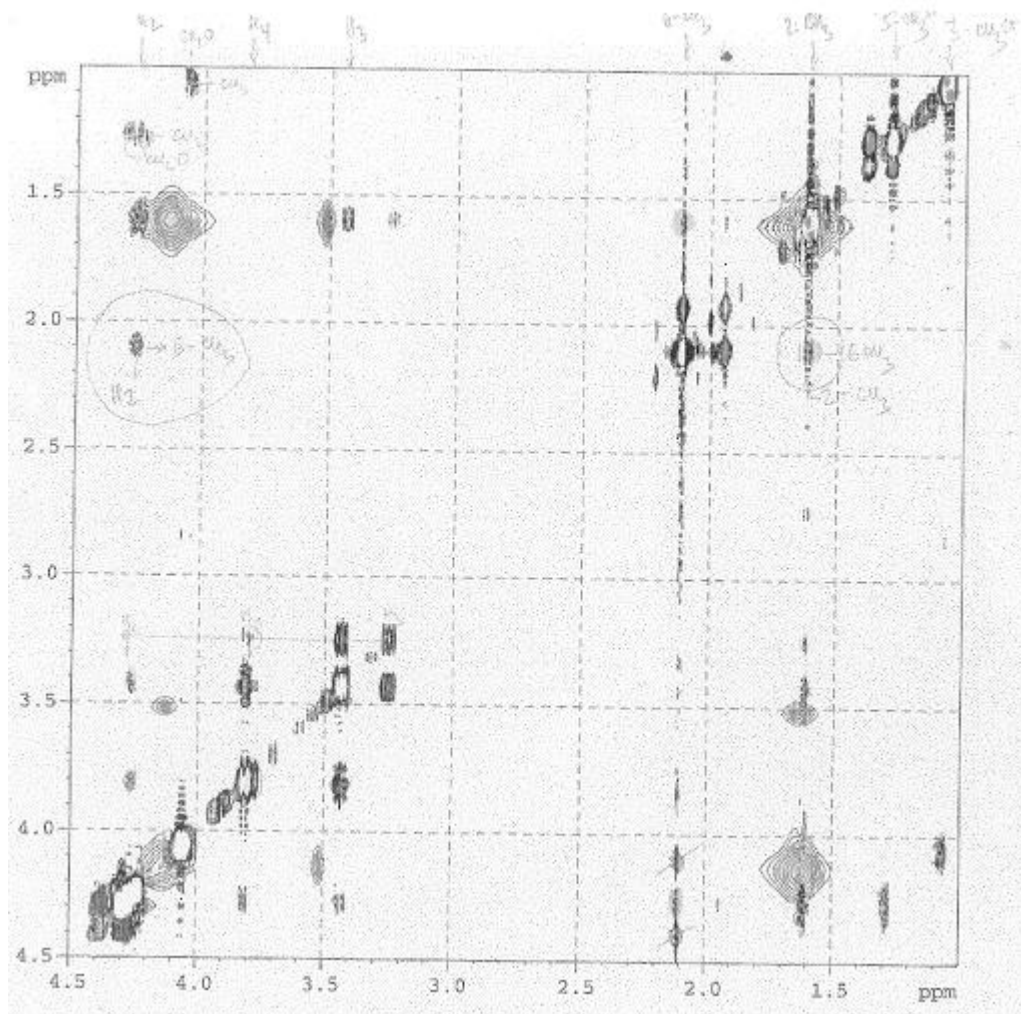

NOESY spectrum in CDCl<sub>3</sub> of 4

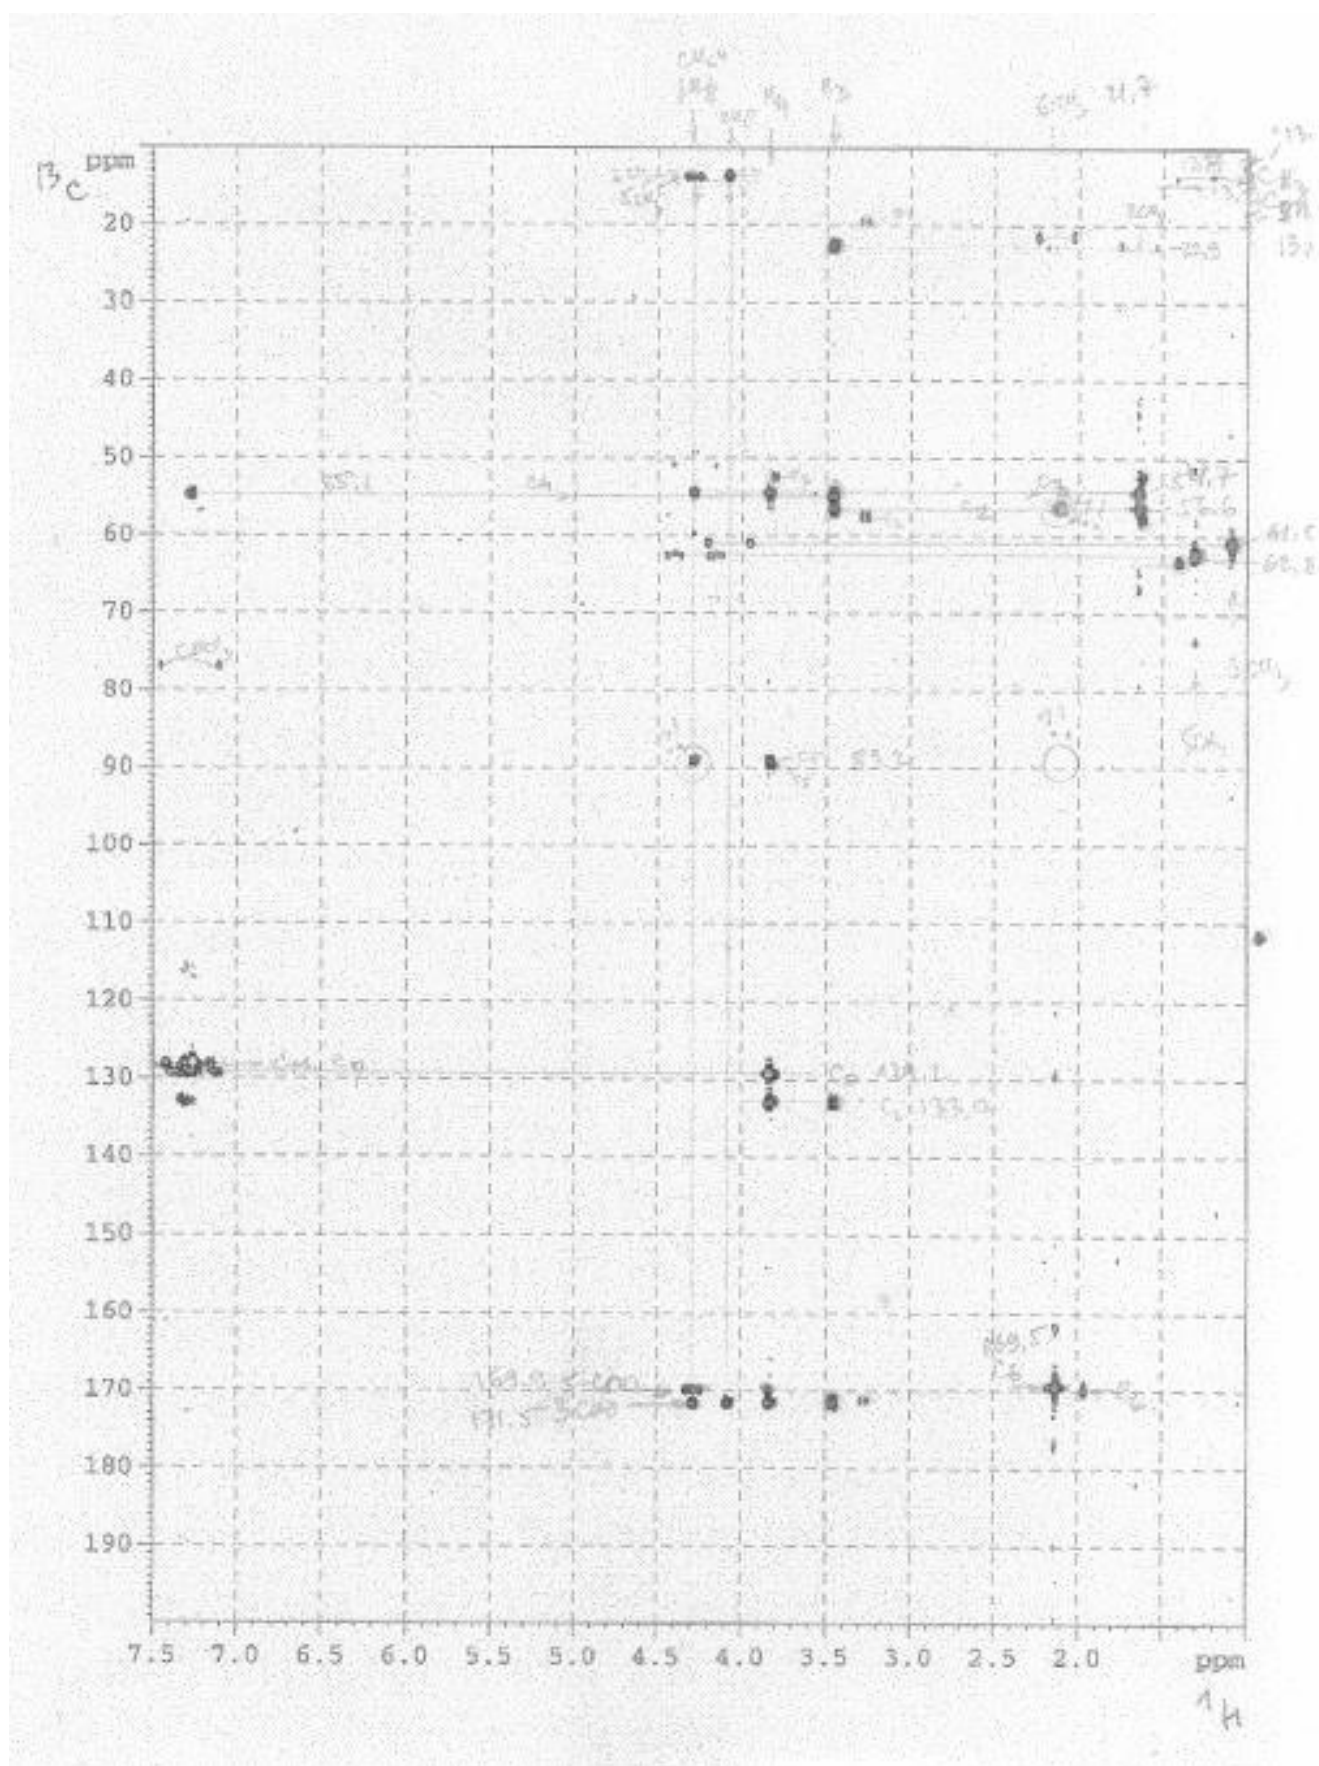

HMBC spectrum in  $\text{CDCl}_3$  of 4

***N*-Acetyl-2,4-diethoxycarbonyl-2-hydroxy-4-methyl-3-phenylpyrrolidine (5)**

$^1\text{H}$  NMR (500 MHz,  $\text{CDCl}_3$ ,  $\delta$ ): 1.08 (t,  $J = 7.0$  Hz, 4- $\text{COOCH}_2\text{CH}_3$ , 3H), 1.33 (t,  $J = 7.0$  Hz, 3- $\text{COOCH}_2\text{CH}_3$ , 3H), 1.63 (d,  $J = 6.1$  Hz, 5- $\text{CH}_3$ , 3H), 2.12 (s,  $\text{COCH}_3$ , 3H), 3.46 (dd,  $J = 12.8$  & 7.9 Hz, 4-H, 1H), 3.99 (d,  $J = 12.8$  Hz, 3-H, 1H), 4.09 (q,  $J = 7.0$  Hz, 4- $\text{COOCH}_2\text{CH}_3$ , 2H), 4.17 (s, OH, 1H), 4.27 (dq,  $J = 7.9$  & 6.1 Hz, 5-H, 1H), 4.28 (AB m,  $J = 7.0$  Hz, 2- $\text{COOCH}_2\text{CH}_3$ , 2H), 7.20 (m, ArH, 5H) ppm.

$^{13}\text{C}$  NMR (125 MHz,  $\text{CDCl}_3$ ,  $\delta$ ): 13.81 (4- $\text{COOCH}_2\text{CH}_3$ ), 13.90 (2- $\text{COOCH}_2\text{CH}_3$ ), 21.03 ( $\text{COCH}_3$ ), 22.94 (5- $\text{CH}_3$ ), 54.72 (4-C), 55.05 (3-C), 56.62 (5-C), 61.10 (4- $\text{COOCH}_2\text{CH}_3$ ), 62.63 (2- $\text{COOCH}_2\text{CH}_3$ ), 89.34 (2-C), 129.03 & 129.21 & 132.91 (ArC), 169.10 ( $\text{COCH}_3$ ), 169.62 (2- $\text{COOCH}_2\text{CH}_3$ ), 171.31 (4- $\text{COOCH}_2\text{CH}_3$ ) ppm.

IR (Nujol,  $\text{cm}^{-1}$ ): 3200 (br), 1750 (s), 1725 (s), 1635 (s).

Anal. Calcd for  $\text{C}_{19}\text{H}_{25}\text{NO}_6$ : C, 62.80; H, 6.93; N, 3.85. Found: C, 62.54; H 6.90; N, 3.72. Mp 82-84 °C.

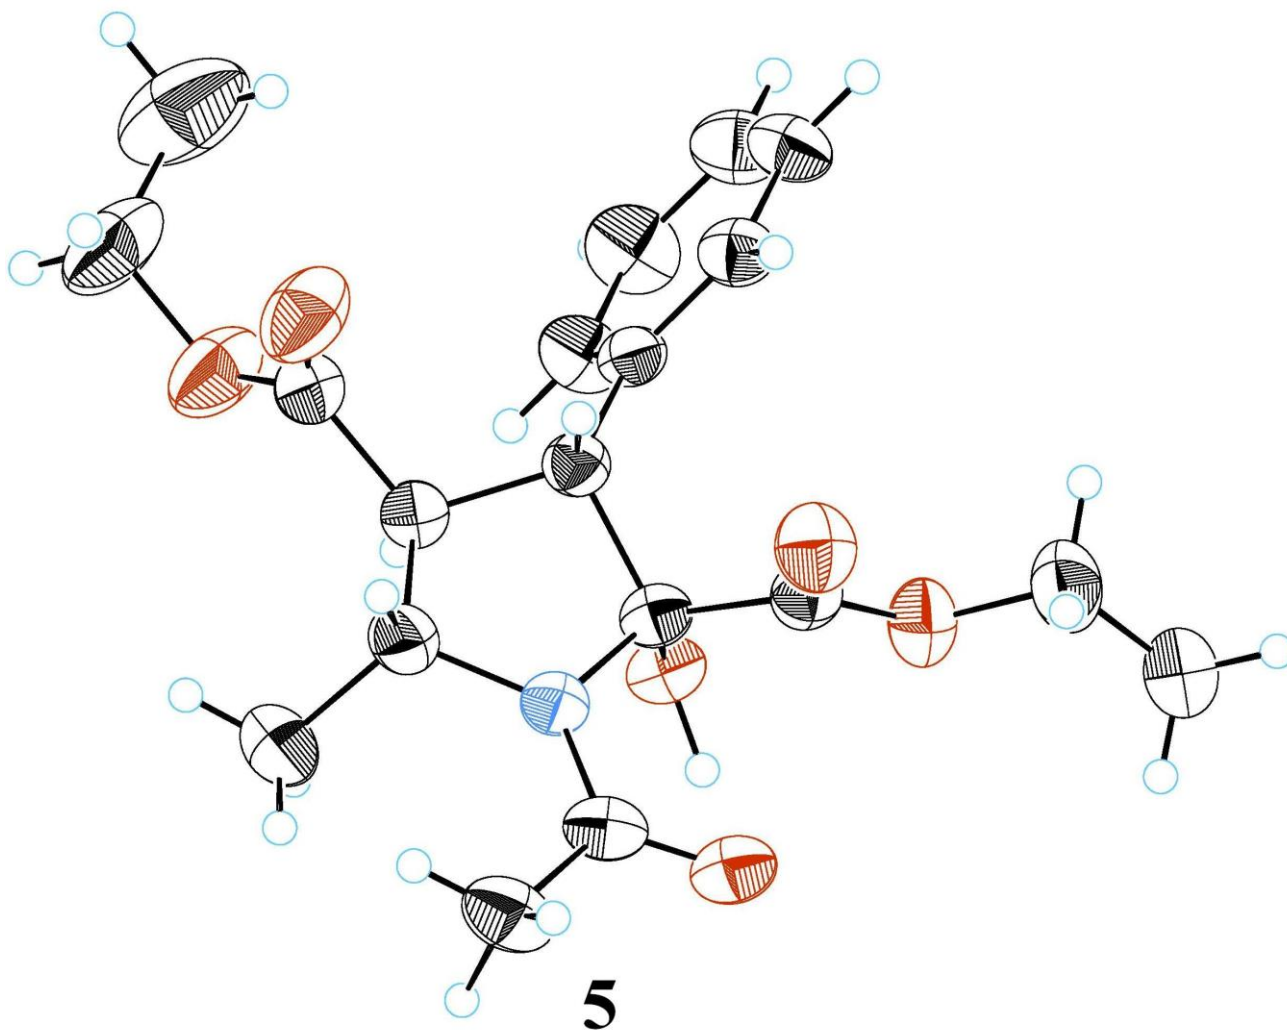

X-ray structure (CCDC 1420767)

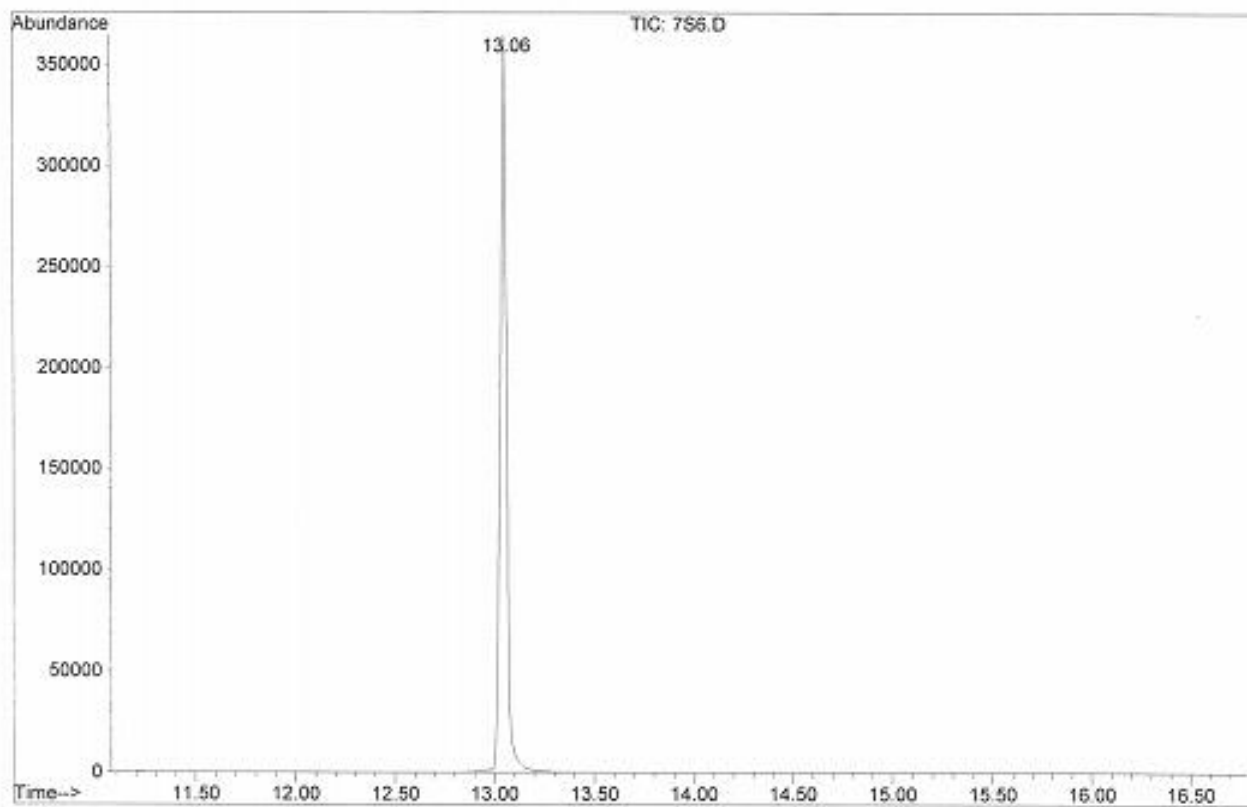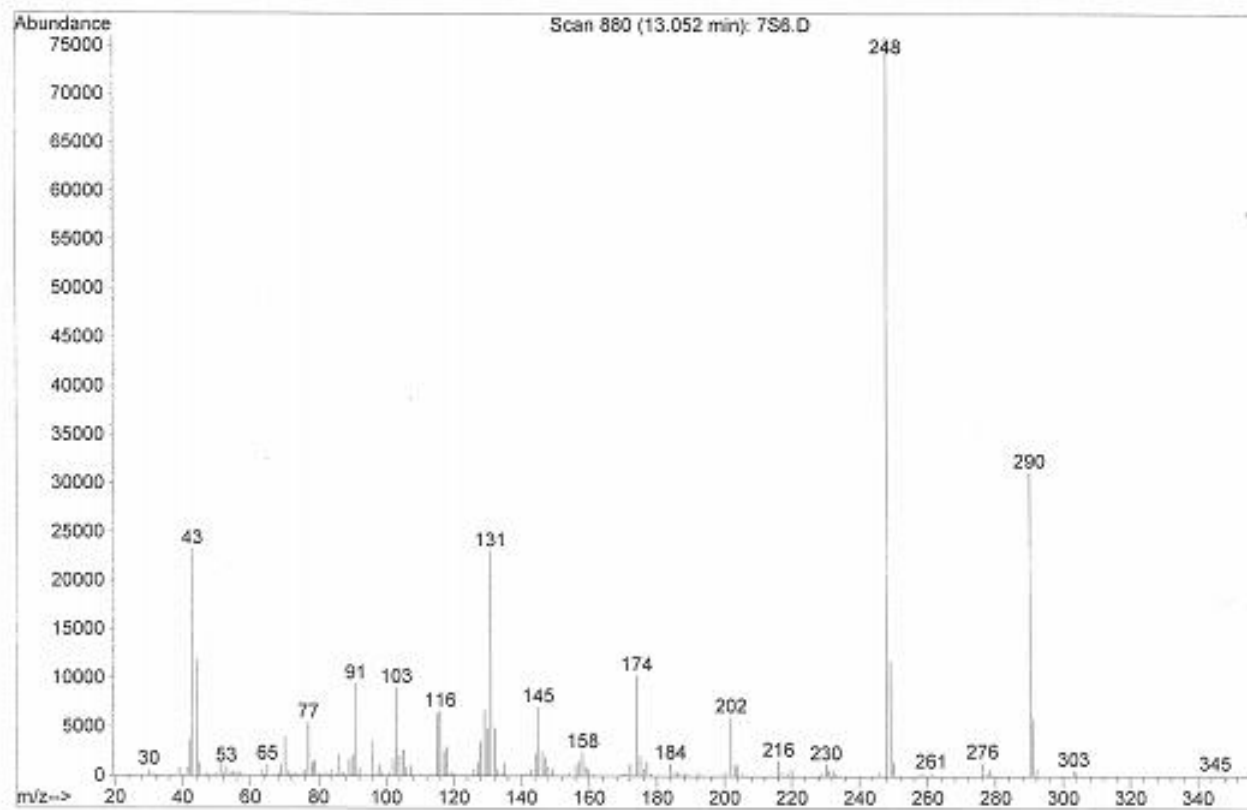

GC-MS spectrum of **5**

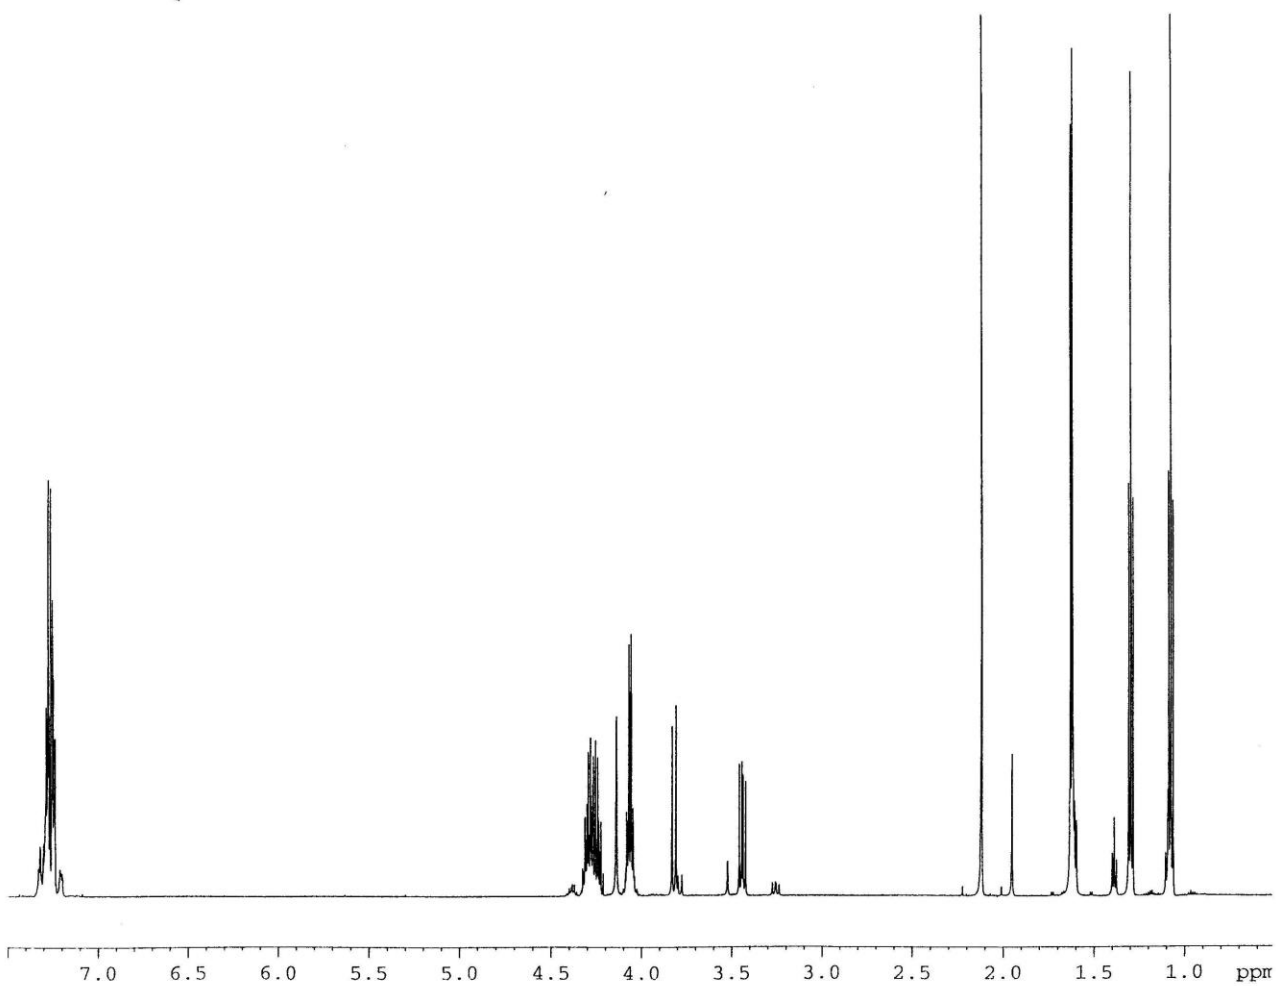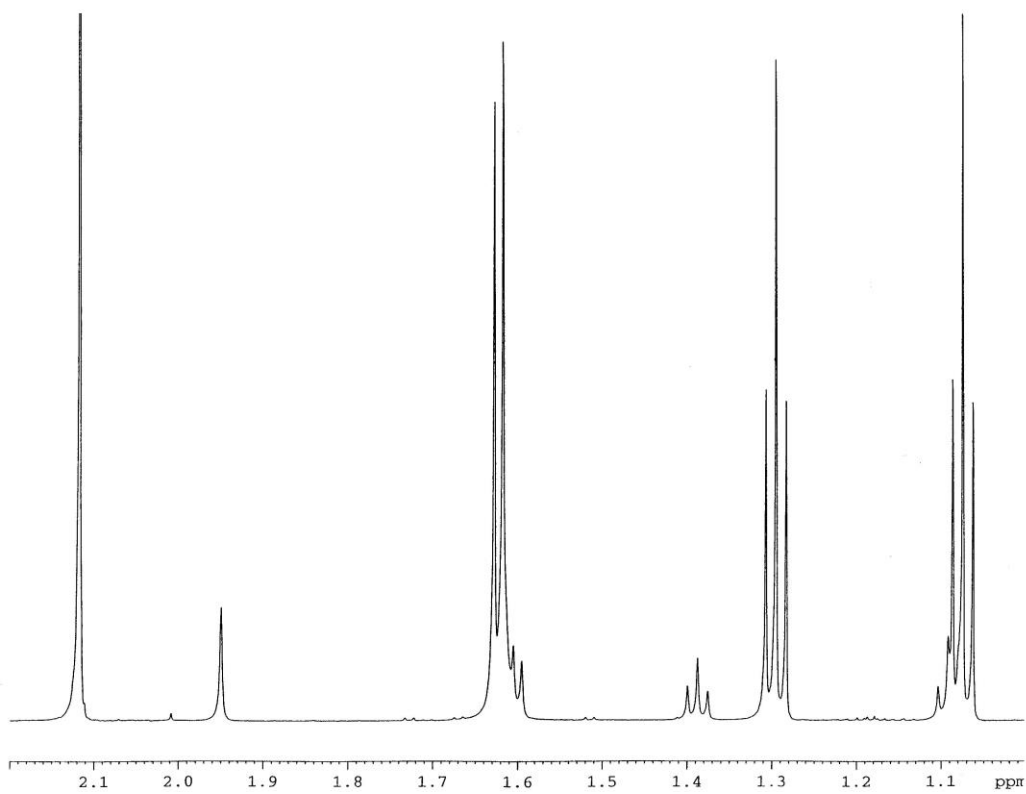

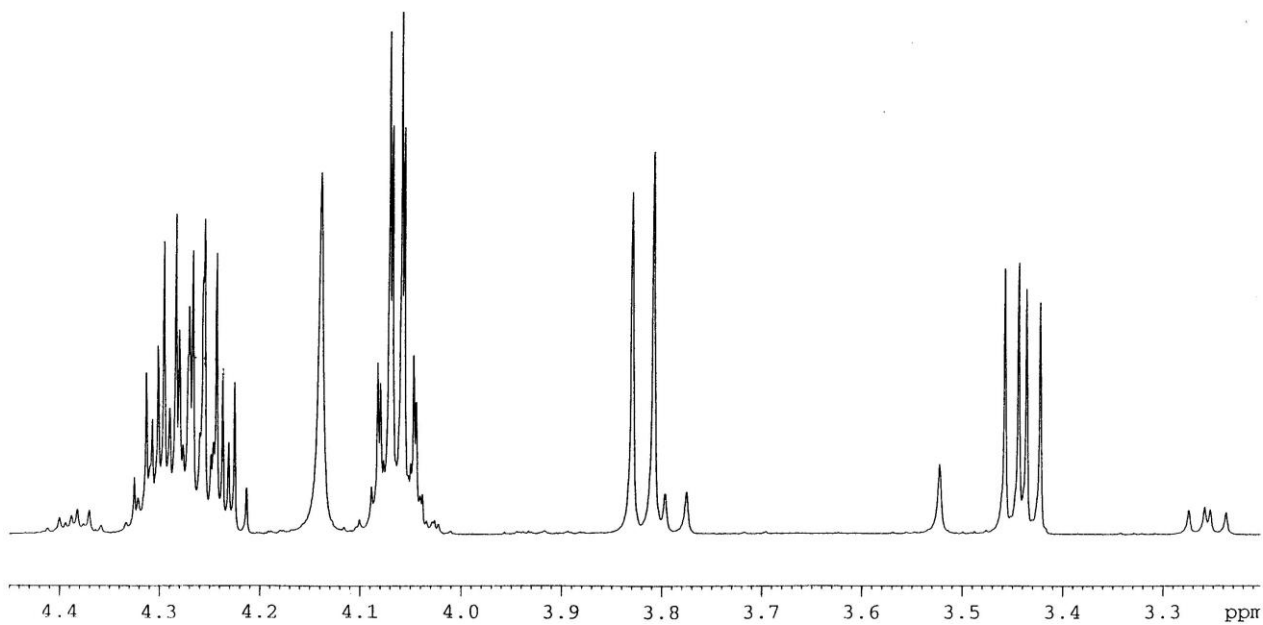

$^1\text{H}$  NMR spectra in  $\text{CDCl}_3$  of **5**

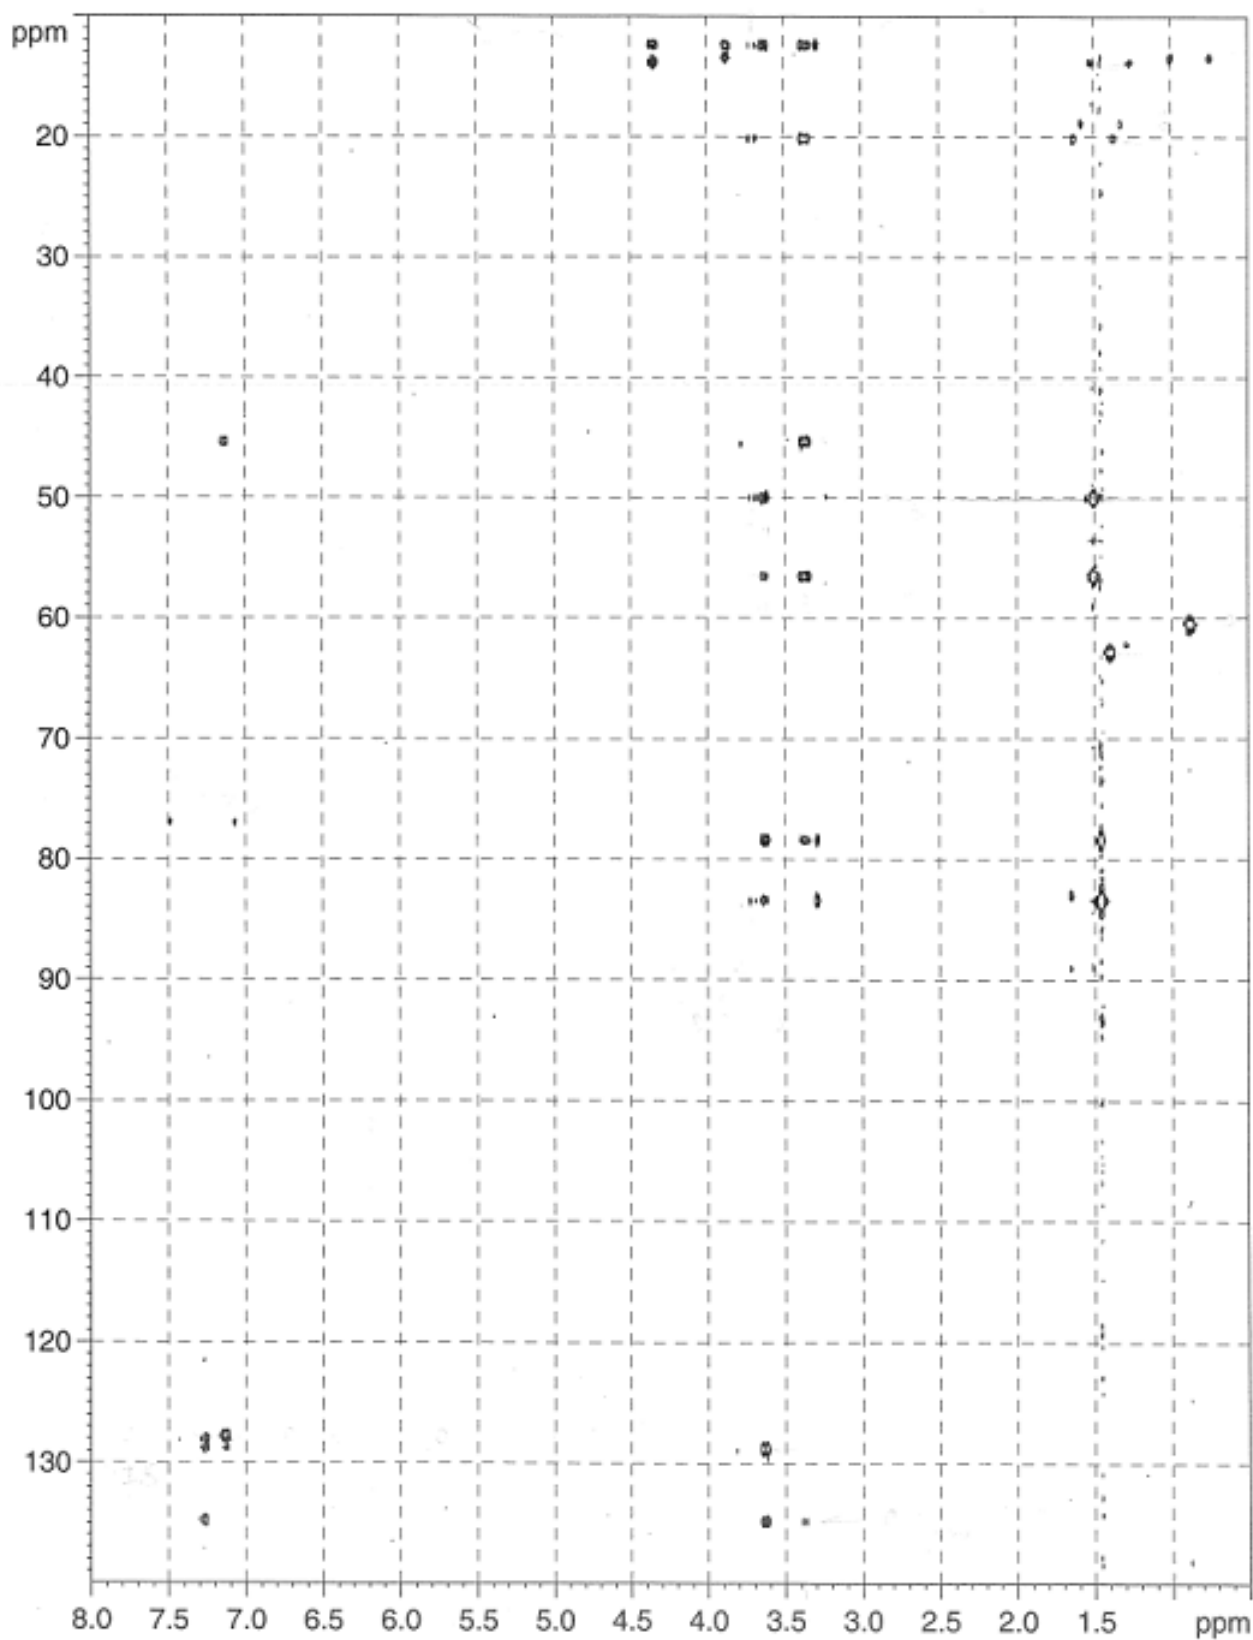

HMBC spectrum in  $\text{CDCl}_3$  of **5**
